# Supplementary material for: Association between lymphocyte-to-monocyte ratio and stroke-associated pneumonia: a retrospective cohort study
Source: PeerJ. 2024 Sep 19;12:e18066. doi: 10.7717/peerj.18066 (PMC11639142; doi:10.7717/peerj.18066)
Supplement: Data S1 [file peerj-12-18066-s003.xlsx]

## Sheet: Sheet1
ID	Sex	Age, year	Hospitalization, days	within 72 hours of symptom onset	Diabetes	Atrial fibrillation	Hypertension	SAP	TG	HDL-C,mmol/l	LDL-C,mmol/l	WBC	Lymphocytes	Neutrophils	Monocyte	TC
1	1	68	22	1	1	0	1	0	8.76	0.54	1.83	2	0.508	1.438	0.044	5.37
2	0	66	15	1	0	0	1	0	2.09	0.86	3.49	5.6	1.204	3.914	0.23	4.87
3	0	73	25	1	0	0	0	0	0.6	1.32	3.67	7.2	1.786	4.658	0.346	5.09
4	0	73	13	1	0	0	1	0	1.07	0.91	3.22	10.2	2.499	6.987	0.49	4.35
5	0	42	6	1	0	0	1	0	1.32	1.26	3.62					5.23
6	0	67	6	1	0	0	1	0	0.75	1.44	3.43	6.9	1.049	5.327	0.442	5.06
7	0	56	8	1	1	0	1	0	2.31	0.74	3.71	6.6	2.64	3.049	0.35	5.26
8	0	36	16	1	0	0	0	0	1.06	1.1	4.1					5.42
9	1	38	29	1	1	0	1	0	1.81	1.12	4.94	8.7	1.731	6.36	0.513	6.57
10	0	54	26	1	0	0	1	1	0.39	2.22	2.4	9.1	1.083	7.28	0.701	4.42
11	0	82	7	1	0	0	1	0	0.79	1.4	2.37	8.2	1.271	5.863	0.566	3.85
12	1	68	18	0	1	0	1	0	5.73	1	3.53	8.4	2.041	5.653	0.328	6.79
13	1	57	9	1	1	0	0	0	1.25	1.26	4.1					5.72
14	1	72	21	1	0	0	1	0	1.71	1.21	3.96	10.1	1.192	7.949	0.606	5.71
15	1	85	12	1	0	0	1	0	1.6	0.98	4.03	13.7	1.945	10.919	0.534	5.46
16	0	67	14	1	1	0	1	0	1.45	0.74	3.01					4.18
17	0	80	11	1	0	0	1	0	0.53	1.6	2.08					3.62
18	0	56	10	1	0	0	1	0	2.31	1.14	5.53	12.8	1.075	11.366	0.294	7.22
19	0	66	10	1	1	0	1	0	1.93	1.18	4.57	5.6	1.159	4.155	0.202	6.53
20	1	75	22	1	1	0	1	0	2.79	0.86	2.44					4.23
21	0	34	8	1	0	0	0	0	0.97	1.33	2.68	11.9	1.761	9.413	0.714	4.09
22	0	49	4	0	0	0	0	0	5.39	0.81	3.64	5.1	1.244	3.448	0.179	5.63
23	1	48	7	0	1	0	1	0	0.85	0.99	2.19	7.9	2.394	5.19	0.261	3.42
24	1	81	12	1	0	0	1	0	1.32	1.11	3.39	5.9	2.39	3.092	0.33	4.69
25	0	51	16	1	0	0	1	0				19.9	1.194	17.97	0.657
26	0	79	6	1	0	0	1	0	0.92	1.15	2.9					4.19
27	0	55	9	1	1	0	0	1	6.51	0.76	2.44	8	2.712	4.744	0.288	4.86
28	0	68	9	1	1	0	1	0	1.93	1.01	2.56	11.1	1.654	7.271	0.766	4.02
29	0	72	11	1	0	0	1	0	1.9	1.04	3.36	7.3	1.643	5.263	0.329	4.79
30	0	70	19	1	0	0	1	0	1.2							6.98
31	1	66	18	1	0	0	1	0	1.09	1.13	2.23					3.7
32	0	71	13	1	1	0	1	1	1.52	1.18	4.14					5.86
33	0	66	6	1	1	0	0	0	2.06	0.96	3.25	6	2.052	3.18	0.384	4.87
34	0	61	11	1	0	0	1	0	0.68	1.46	2.83					4.38
35	1	42	13	1	0	0	0	0	0.54	1.22	2.51	8.2	1.32	6.38	0.443	3.75
36	1	70	17	1	1	0	1	0	2.05	1.17	4.29	7.6	1.277	5.936	0.296	6.13
37	0	54	15	1	0	0	1	0	0.56	1.34	2.01	8.7	2.271	5.838	0.392	3.48
38	1	70	8	1	0	0	1	0	0.59	1.74	2.28	9	0.765	7.587	0.549	4.04
39	0	79	7	0	1	0	1	0	0.64	1.13	1.34	6.4	1.344	4.384	0.339	2.58
40	1	65	9	1	0	1	1	0	1.72	1.24	3.21	8.9	3.133	5.251	0.472	4.69
41	1	67	10	0	1	0	1	0	2.17	0.91	3.59	10.9	2.3	7.99	0.458	5.04
42	0	77	10	1	0	0	1	0	0.52	1.38	2.57	5.2	1.014	3.474	0.52	3.95
43	0	64	11	1	0	0	1	0	1.01	1.38	4.77	7.4	1.769	5.121	0.348	6.41
44	0	47	6	1	0	0	1	0	3.43	0.81	2.9	6.7	1.166	4.951	0.449	4.54
45	0	73	7	1	1	0	1	0	0.5	0.94	2.36	7.2	1.994	4.104	0.799	3.44
46	0	48	6	1	0	0	1	0	1.76	1.07	4.07	6.4	1.286	4.698	0.365	5.55
47	1	49	6	1	0	0	1	0	1.58	0.6	1.39					2.4
48	0	70	7	1	0	0	0	0	0.36	1.8	2.8					4.51
49	1	87	5	1	1	0	1	0	1.17	1.62	2.77	4.9	1.21	3.42	0.172	4.55
50	1	70	13	1	0	1	1	0	0.78	0.91	3.04	11.6	0.94	10.104	0.418	3.98
51	0	78	10	1	1	0	1	0	0.77	1.31	1.81	7.7	1.309	5.429	0.547	3.25
52	0	54	10	1	0	0	1	0	3.76	0.85	4.04					6.23
53	0	56	4	1	0	0	1	0	1.11	1.49	3.26	10.5	1.134	9.041	0.284	4.91
54	0	69	5	1	1	0	1	0	2.58	0.63	3.17	10.5	2.352	7.109	0.599	4.53
55	0	84	18	1	0	1	0	0				6.2	0.887	4.768	0.453
56	1	68	16	1	1	0	0	0	1.52	1.19	3.35	12.6	0.857	10.975	0.769	4.9
57	0	67	7	1	0	0	1	0	1.08	1.22	1.12	14.8	2.042	12.121	0.533	2.64
58	0	82	8	1	0	0	1	0	1.25	1.15	3.44	7.9	1.375	5.941	0.506	4.76
59	0	47	23	1	0	1	0	0	3.25	0.86	4.45					6.41
60	0	77	7	1	0	0	1	0	0.56	0.8	2.57	11.5	1.001	9.856	0.61	3.49
61	1	83	14	1	1	0	1	0	1.46	1.51	4.57	8	2.232	5	0.528	6.17
62	1	76	14	1	0	0	1	0	1.47	1.38	3.78	10.6	4.06	5.639	0.541	5.34
63	1	82	10	1	0	0	1	1	0.83	1.04	2.11	8.1	0.664	6.553	0.559	3.25
64	0	82	13	1	0	0	1	1	1.03	1.08	1.7	6.8	0.911	5.27	0.551	3.02
65	0	75	20	1	1	0	1	0	1.1	0.64	1.6	10.4	1.737	7.509	0.822	2.57
66	0	68	7	1	1	0	1	1	2.29	0.9	4.21	6.4	1.018	4.864	0.39	5.76
67	0	61	18	1	0	0	1	0	0.85	1.1	2.35					3.6
68	0	71	15	1	1	0	1	0	1.96	1.48	4.73	5.7	1.562	3.426	0.399	6.63
69	0	65	6	0	0	0	1	0	2.27	0.8	1.94					3.52
70	0	55	6	1	0	0	1	0	1.46	1.04	3.06	3.7	1.162	2.076	0.211	4.59
71	0	71	17	1	1	0	1	0	1.49	0.87	3.1	9.1	2.566	5.542	0.501	4.47
72	0	44	8	0	1	0	1	0				6.6	2.244	3.914	0.37
73	0	52	14	1	1	0	1	0	3.12	0.85	2.98	9.3	1.972	7.049	0.242	4.79
74	1	56	6	1	0	0	1	0	0.64	1.2	2.26	5.9	1.174	4.372	0.254	3.71
75	1	76	18	1	1	1	1	1	1	1.31	2.98	9.4	2.331	6.655	0.385	4.71
76	0	39	7	1	0	0	0	0	2.34	0.76	3.11					4.59
77	0	68	12	1	1	0	1	0	0.62	1.3	3.26					4.69
78	1	50	11	1	0	0	0	0	1.7	1.21	1.39	6.4	2.816	3.219	0.282	2.94
79	0	66	3	1	0	1	1	0	1.21	1.16	2.88	9.2	0.616	8.271	0.294	4.5
80	1	73	22	1	0	0	1	0	2.33	0.8	3.85	7.8	1.825	4.563	0.538	5.53
81	1	25	5	1	0	1	0	1	1.12	0.86	2.26	10.8	2.106	8.381	0.27	3.43
82	0	75	7	1	1	1	1	0	0.72	1.04	1.22	6.9	2.27	3.974	0.4	2.45
83	0	82	9	1	0	0	1	0	1.25	0.99	3.53	6.4	1.011	4.794	0.582	5.07
84	1	63	7	1	0	1	0	0	0.56	1.54	2.11					3.84
85	0	60	9	1	0	0	0	0	0.87	1.04	3.31	10.4	1.726	8.008	0.52	4.64
86	1	68	11	1	1	0	1	0	2.83	1.28	2.23	8.3	1.652	6.3	0.332	4.55
87	0	62	7	1	1	0	1	0	2.2	0.98	3.3					5.01
88	1	54	15	1	0	0	1	0	2.32	1.05	4.57	6.9	1.704	4.885	0.269	6.8
89	1	66	5	1	0	0	1	0	1.31	0.99	2.45					3.71
90	0	49	6	1	0	0	1	0	0.58	1.24	1.72	6.7	0.978	5.373	0.281	3.16
91	0	63	25	1	0	0	1	0	1.57	0.79	3.37	9.5	1.169	6.992	0.58	4.8
92	0	67	9	1	0	0	1	1	0.51	1.36	2.55	10.7	0.877	9.127	0.663	4.01
93	0	58	18	1	1	0	1	0	2.39	0.56	2.03	8.8	1.786	6.53	0.405	3.28
94	0	60	15	1	0	0	0	0	0.58	1.52	1.83	6.4	0.48	5.709	0.16	3.5
95	0	74	15	1	0	0	1	0	0.65	0.98	1.05	3.9	0.858	2.648	0.242	2.22
96	1	65	8	1	0	0	1	0	2.03	1.23	4.35	11.5	1.369	9.683	0.403	6.01
97	0	71	22	1	1	0	1	1	1.09	0.88	2.47	10.5	0.63	9.377	0.452	3.77
98	1	66	9	1	0	0	1	0	1.9	0.97	3.07	10.5	1.911	7.487	0.515	4.6
99	1	52	8	1	0	0	1	0	1.87	1.1	3.38					5.01
100	0	71	7	1	1	0	1	0	0.76	0.77	0.89	3.8	1.588	1.767	0.182	1.88
101	0	70	11	1	0	0	1	0	0.93	0.99	3.39	6.6	1.419	4.679	0.376	4.66
102	0	65	10	1	1	0	1	0	1.93	0.76	3.16					4.46
103	0	76	12	1	0	0	1	0	0.89	1.04	4.02					5.29
104	1	70	11	1	1	0	1	0	1.93	1.04	3.87	5.7	0.992	4.406	0.222	5.37
105	0	79	24	0	0	0	1	0	1.03			4.7	0.978	2.806	0.15	2.93
106	0	53	19	1	1	0	1	0				10.4	1.976	7.686	0.624
107	0	70	7	1	1	0	1	1	1.87	1.03	3.27	9.7	2.192	6.664	0.65	4.7
108	0	66	15	1	1	0	1	0	1.43	0.77	3.03	15.1	6.312	7.882	0.695	4.2
109	1	62	5	1	0	0	1	0	2.76	1.3	5.76	8.1	2.924	4.617	0.348	7.77
110	0	56	4	1	0	0	1	0	0.67	1.06	2.61					3.8
111	1	71	14	0	1	0	1	0	1.19	0.96	1.36	6.4	1.267	4.659	0.301	2.65
112	0	70	7	0	0	0	1	0	1.44	0.95	4.25	5.5	1.667	3.278	0.374	5.77
113	0	67	13	1	0	0	1	0	0.93	1.54	4.17					5.79
114	0	54	11	1	0	0	1	0	1.46	1.2	3.53	10.5	3.014	6.71	0.536	5.11
115	0	65	18	0	0	0	1	0	3.25	0.7	3.38	10.4	1.05	8.486	0.655	4.98
116	0	80	7	1	1	0	1	0	0.73	1.63	2.92	5.4	1.631	3.062	0.572	4.66
117	1	46	29	1	0	0	1	0	8.3	0.71	1.52	7.2	1.973	4.766	0.418	4.85
118	1	53	6	1	1	0	1	0	1.61	1.1	1.6	9.7	1.513	7.653	0.417	3.06
119	1	54	7	1	0	0	1	0	1.62	0.98	3.04					4.29
120	1	68	9	0	0	0	1	0	4.12	1	2.08	9.1	2.694	5.961	0.364	4.23
121	0	71	8	1	1	0	0	0				3.7	0.903	2.272	0.407
122	0	62	6	1	0	0	1	0	3.92	1.12	4.48	6.5	0.956	4.966	0.449	6.42
123	0	74	10	1	0	0	0	0	2.59	0.78	2.97	10	2.12	6.64	0.7	4.55
124	0	59	9	1	0	1	0	0	0.55	0.98	2.53	7.4	2.028	4.64	0.525	3.58
125	0	63	8	1	0	0	1	0	1.9	1.03	2.95	5.8	0.65	4.698	0.4	4.5
126	0	69	10	1	1	0	1	0	3.05	0.73	2.03	10.4	2.735	6.708	0.416	3.65
127	1	70	7	1	0	0	1	0	4.2	0.94	2.05	8	1.792	5.208	0.76	4.33
128	1	70	7	0	1	0	0	0	0.75	1.18	4.43	6.8	1.836	4.304	0.238	5.54
129	0	55	10	0	1	0	0	0	3.15	1.21	4.58	6.3	1.594	4.309	0.296	6.3
130	0	63	6	0	0	0	1	0	1.81	0.77	4.09	11	3.201	6.501	0.55	5.44
131	1	75	16	1	1	0	1	0	4.29	0.83	3.05	8.1	2.3	5.362	0.348	5.15
132	1	85	8	1	1	0	1	0	1.15	1.08	1.98	7.2	1.238	4.889	0.59	3.41
133	1	61	5	1	0	0	1	0	1.46	1.29	3.05					4.44
134	0	59	9	1	1	0	1	0	1.83	0.93	6.02	9.1	1.775	6.889	0.328	7.47
135	0	52	7	1	0	0	1	0	2.39	0.95	3.83	14.5	1.61	11.586	1.131	5.37
136	1	69	9	1	0	0	1	0				5.2	0.796	4.066	0.218
137	0	86	8	1	0	0	1	0	1.17	0.78	1.12	6.5	1.612	3.894	0.585	2.29
138	0	57	8	1	0	0	1	0	0.74	1.14	1.69					2.95
139	0	61	15	1	1	0	1	0	2.31	0.93	3.5	7.7	2.811	4.127	0.385	4.89
140	0	37	15	1	1	0	1	0	5.28	1.05	2.88					5.42
141	0	47	13	1	0	0	0	0	1.25	1.04	3.93	9.4	2.444	6.072	0.517	5.15
142	0	64	27	1	0	0	1	1	1.25	1.08	3.89	8	0.64	6.536	0.616	5.3
143	1	47	25	1	0	0	1	0	1.46	1.17	3.13	16.6	2.258	13.629	0.647	4.56
144	0	52	18	1	1	0	1	0				5.1	1.219	3.295	0.372
145	0	64	11	1	0	0	1	0	0.84	1.19	2.98	6.4	1.965	3.706	0.339	4.29
146	1	45	8	1	0	0	0	0	0.88	0.75	2.43	9.4	2.247	6.204	0.78	3.34
147	0	50	9	1	0	0	0	0	1.14	1.14	3.54					4.78
148	1	88	12	1	0	0	1	0	1.07	0.99	4.54	5	0.99	3.75	0.18	5.78
149	1	53	6	1	1	0	1	0	1.1	1.16	1.83	6.7	0.992	5.213	0.409	3.24
150	0	50	27	1	0	0	1	0	1.88	1.16	3.02					4.7
151	0	73	6	1	0	1	1	0	0.92	1.48	2.13					3.8
152	0	52	14	1	1	0	1	0	2.51	1.67	4.14	8.7	2.61	5.02	0.661	6.19
153	1	57	27	1	1	0	0	0	1.13	1.45	4.67	5.1	1.877	2.545	0.388	6.25
154	0	71	13	1	1	0	1	0	0.71	1.56	1.41	11.6	1.079	9.872	0.603	3.06
155	1	67	11	1	1	0	1	0	1.15	1.07	2.88	7.6	1.664	4.507	1.429	4.08
156	0	70	12	1	0	1	1	0	1.93	0.89	2.73					4.35
157	0	84	13	1	0	1	1	1	0.58	1.46	1.73	12.1	0.242	11.386	0.448	3.12
158	1	77	7	1	0	0	1	1				8.7	1.366	6.334	0.966
159	0	81	25	1	1	0	1	0	1.63	0.69	3.12	5.5	1.425	3.636	0.297	4.43
160	0	57	8	1	1	0	1	0	1.65	0.91	4.49	8.3	2.54	4.598	0.481	5.93
161	0	62	6	1	0	0	1	1	1.68	1.28	4.14	14.7	1.882	11.628	1.132	5.94
162	0	63	12	1	1	0	1	0	1.44	0.83	1.03	5.6	0.868	4.323	0.319	2.36
163	0	56	14	1	0	0	1	0	0.63	0.83	1.69	8.8	0.889	7.278	0.581	2.62
164	0	51	14	1	1	0	1	0	2.11	0.86	2.5	10.5	1.88	8.169	0.347	4.19
165	1	79	15	1	1	0	1	1	0.54	1.1	3	7.7	1.486	5.567	0.578	4.28
166	1	31	12	1	0	0	0	0	0.92	0.84	3.23	8.3	1.245	6.399	0.556	4.3
167	0	47	12	1	0	0	0	0	2.65	1.07	2.6	8	1.856	4.944	0.632	4.4
168	0	55	10	1	0	0	0	0	1.03	0.83	3.36	11.5	2.358	8.648	0.426	4.58
169	0	53	14	1	1	0	1	0				7.8	2.059	5.031	0.382
170	0	52	4	1	1	0	1	0	2.63	0.76	3.26					4.91
171	1	74	12	0	1	0	1	0	1.08	1.19	4.08	17.7	3.168	13.47	0.956	5.73
172	0	56	7	1	0	0	1	0	0.91	1.3	3.25	10.6	0.965	8.999	0.594	4.69
173	0	67	24	1	0	0	1	0	2.15	1.11	3.07	10.5	2.195	7.308	0.704	4.84
174	0	61	30	1	0	0	1	1	1.6	0.7	2.96	9.7	1.95	5.966	1.213	4.23
175	0	38	6	1	0	0	1	0	1.44	0.9	2.83	14.5	1.682	12.151	0.624	4.12
176	0	51	6	1	1	0	1	0	1.22	1.16	3.5	8.6	1.557	6.14	0.611	4.97
177	0	78	7	1	0	0	1	1	1.52	1.03	2.64	9.6	1.594	6.73	1.027	4.11
178	1	44	6	0	1	0	1	0	1.06	0.86	1.69	12.5	2.575	9.063	0.75	2.83
179	0	58	16	0	1	0	1	0	1.95	0.6	1.97	14	1.666	11.522	0.784	3.47
180	0	62	2	1	0	0	1	0	1.01	0.84	3.13	13.9	1.682	11.551	0.653	4.21
181	0	77	10	1	0	0	0	0	0.96	1.17	2.73	7.9	1.517	5.822	0.45	4.3
182	1	73	5	1	0	0	1	0	1.82	0.78	1.81	9.5	1.634	6.973	0.38	3.28
183	0	35	9	1	0	0	0	0	0.85	1.07	2.27	7.7	1.802	5.321	0.47	3.55
184	0	72	8	1	0	0	1	0	0.75	1.55	2.22	8.6	1.058	7.164	0.378	4
185	0	44	10	1	0	0	1	0	2.22	0.94	4.73	10.2	1.132	8.864	0.173	6.16
186	0	81	9	1	0	0	1	0	0.88	1.03	2.56	11.9	1.19	9.52	0.928	3.95
187	1	62	11	1	0	0	1	0	1.15	0.97	3.02					4.33
188	0	61	6	1	1	0	1	0	1.82	0.99	3.39	7.1	1.377	5.403	0.22	4.89
189	0	65	18	0	1	0	1	0	2.19	1.04	2.77	9.6	1.997	6.73	0.518	4.43
190	0	57	6	1	0	0	1	0				9.8	1.196	8.075	0.421
191	0	61	7	1	0	0	1	0	0.89	0.99	2.93	7.8	1.42	5.772	0.406	4.2
192	1	63	8	1	1	0	0	0	1.7	1.4	3.1					4.85
193	0	48	10	1	0	0	1	0	3.02	0.74	1.91	9.7	2.367	6.625	0.456	3.5
194	0	82	18	0	1	0	0	0	1.19	1.39	2.39	9.9	1.594	7.593	0.653	4.08
195	0	68	7	1	0	1	1	0	0.81	1.28	1.07	7.2	1.382	5.35	0.338	2.58
196	0	58	7	1	0	0	0	0	2.05	1.12	3.28	8.6	1.6	6.476	0.413	4.9
197	0	74	17	1	1	0	1	0	0.97	1.13	5.73	11	0.638	10.131	0.209	7.25
198	0	69	9	1	1	0	1	0	1.82	0.81	1.53	15.7	3.234	11.21	0.926	2.98
199	1	49	7	1	0	0	1	0	0.83	1.46	3.06					4.75
200	0	55	7	1	1	0	1	0	1.97	1.16	3.46					5.3
201	1	65	16	0	0	0	0	0	1.05	1.01	2.97	6.8	1.938	4.325	0.469	4.34
202	0	66	13	0	1	0	1	0	0.91	0.66	0.95	6.8	1.387	4.774	0.49	1.94
203	0	42	8	1	0	0	1	0	1.47			7	2.289	3.976	0.483	5.03
204	0	66	6	1	0	0	1	0	1.17	1.02	3.69	10.3	2.276	6.819	0.886	5.38
205	1	53	9	1	1	0	1	0	1.94	0.99	3.06	6.8	1.496	4.706	0.449	4.6
206	1	64	9	1	1	0	0	0	1.34	1.32	3.58					5.31
207	0	60	11	1	0	0	1	0	1.11	1.35	3.38	8.5	2.04	5.585	0.417	5.13
208	1	72	10	0	0	0	1	0	1.88	1.18	4.83	4.9	1.789	2.504	0.397	6.68
209	0	58	10	0	0	0	1	0	2.05	1.27	2.56	5.5	1.199	3.696	0.407	4.47
210	1	63	8	1	1	0	1	0	4.78	0.97	6.37	7.3	1.759	5.19	0.307	10.73
211	0	67	7	1	0	0	1	1	0.32	1.35	2.25	10.3	1.926	7.571	0.731	3.63
212	0	51	17	1	0	0	1	0	1.76	1.08	2.77	9.3	1.051	7.58	0.502	4.41
213	0	64	7	1	0	0	1	0	1.44	1.26	2.82	15.9	1.383	13.595	0.89	4.46
214	0	70	25	1	0	0	1	0	1.55	1.03	3.28	10.4	1.976	7.727	0.582	4.91
215	1	41	15	1	0	0	0	1	2.31	1.26	5.3	18.2	2.166	15.161	0.837	7.42
216	0	42	7	1	0	0	0	0	2.1	1.06	4.79					6.55
217	1	65	6	1	1	0	0	0	1.16	1.16	3.26	4.5	0.923	3.339	0.212	4.72
218	0	51	13	1	0	0	1	0	1.98	0.9	3.43	6.5	2.191	3.647	0.325	4.79
219	0	58	29	1	1	0	1	0	3.31	0.83	2.57	9.2	1.95	6.192	0.543	4.24
220	0	48	24	1	0	0	0	0	0.86	0.91	3.21					4.28
221	1	69	7	1	0	0	1	0	0.84	1.08	1.93	5.8	1.189	4.089	0.435	3.22
222	0	26	19	1	0	0	1	0	0.31	1.03	1.96	12	1.5	9.696	0.756	2.96
223	0	72	11	1	1	0	1	1	1.5	0.59	0.69	10.7	2.012	7.982	0.428	1.8
224	0	56	8	1	0	0	1	0	2.2	0.8	3.97	6.7	1.474	4.63	0.509	5.29
225	1	66	9	1	0	1	1	0	0.95	1.31	4.12	7.8	0.78	6.794	0.179	5.47
226	0	69	9	0	1	0	1	0	1.99	0.71	1.4	10	1.88	6.82	0.74	2.62
227	0	65	14	1	0	0	1	0	3.91	0.82	2.98	8.7	1.235	6.577	0.566	4.81
228	0	43	11	1	0	0	1	0	2.04	0.71	3.48					4.9
229	0	58	15	1	0	0	1	0	0.64	1.44	1.67	8	0.816	6.744	0.392	3.34
230	1	65	22	1	0	0	1	0	0.89	1.18	3.33					4.82
231	0	68	8	0	0	0	1	0	1.19	1.01	1.91	3.9	0.737	2.82	0.273	3.37
232	0	67	4	0	1	0	1	0	0.73	0.71	1.11	5.9	1.392	3.776	0.443	2.14
233	1	67	19	0	0	0	1	0	1.79	0.9	2.43	8.9	2.777	4.717	0.472	3.84
234	1	59	19	1	1	0	1	1	1.17	1.13	2.16	4.5	0.756	2.948	0.468	3.81
235	0	91	11	0	0	0	1	0	0.76	1.05	2.03	10	0.68	8.77	0.54	3.34
236	0	63	11	0	0	0	0	0	0.8	1.34	2.49	9.5	1.045	7.638	0.665	3.99
237	1	46	18	1	0	0	1	0	0.88	1.18	2.76	6.8	1.999	4.298	0.272	4.23
238	0	60	10	1	1	1	1	0	1.45	1.13	3.07	7	1.498	4.914	0.371	4.81
239	0	79	13	1	0	0	1	0	1.45	1.35	4.34	6.2	1.569	3.9	0.601	6.11
240	1	80	9	1	0	0	1	0	0.71	1.84	4.25	7.7	1.455	5.583	0.554	6.19
241	1	68	8	0	0	0	1	0	1.91	1.19	4.13	4.3	1.475	2.58	0.198	5.67
242	0	67	7	1	0	1	0	0	1.31	1.27	3.05	4.3	1.066	2.675	0.37	4.76
243	1	60	9	1	1	0	1	0	1.17	0.98	2.79	6.7	1.394	4.683	0.556	4.15
244	1	75	21	1	1	0	1	0	0.74	0.88	2.54	11.6	2.158	8.978	0.383	3.69
245	0	46	12	1	0	0	0	0	0.64	1.1	1.83	11.1	0.644	9.879	0.544	3.13
246	0	60	14	0	1	0	1	0	0.42	1.79	1.98	6	1.266	3.768	0.528	3.9
247	1	76	8	0	0	0	1	0	0.7	0.99	3.34	9	2.241	6.219	0.432	4.52
248	0	52	4	1	0	0	0	0	1.41	0.82	2.2	8	1.448	6.112	0.4	3.37
249	0	51	17	1	0	0	1	0	0.45	1.16	2.36	11.7	0.655	10.553	0.445	3.64
250	0	56	8	1	0	0	1	0	0.93			7.6	0.942	6.43	0.22	5.29
251	0	68	12	1	1	0	1	0	1.75	0.73	3.89	11.7	1.568	8.471	0.386	5.17
252	0	48	15	1	1	0	1	0	3.02	0.98	4.51	4.6	1.458	2.355	0.488	6.46
253	0	68	10	0	0	0	1	0	1.65	1.07	4.74	7.8	2.207	4.547	0.476	6.59
254	0	61	24	1	1	0	1	0	3.4	1.48	4.63	12.4	2.393	9.139	0.794	6.87
255	0	23	11	1	0	0	0	0	1.75							4.19
256	1	48	7	1	0	0	1	0	1.87	1.17	2.24	8.1	1.531	5.986	0.421	3.88
257	1	67	13	0	1	0	1	1	1.76	0.87	3.85	10.4	1.57	8.341	0.343	5.19
258	1	77	17	0	1	0	1	0	1.02	1.31	2.71	11.5	2.726	7.498	0.955	4.41
259	0	51	13	1	0	0	1	0	0.9	0.82	2.21					3.34
260	0	69	17	1	0	0	1	1	0.86	1.64	3.26	14.4	2.29	11.506	0.576	5.05
261	0	69	21	1	1	0	1	0	2.22	1.34	2.35	8.2	1.558	5.904	0.517	4.09
262	1	81	6	1	1	0	1	0	4.29	1	3.21					5.76
263	0	46	14	1	1	0	0	0	2.66	1.23	3.32	9.5	2.252	6.679	0.39	5.05
264	1	69	11	0	1	0	1	0	4.04	0.87	2.62	7.5	1.8	5.273	0.338	4.58
265	1	69	6	1	1	0	1	0	0.81	1.76	2.68	7.8	1.357	6.131	0.281	4.59
266	1	67	14	1	1	0	1	0	1.04	1.36	3.21	6.8	1.278	5.263	0.231	4.7
267	0	42	2	0	1	0	1	0	1.78	1.12	3.83	8.6	0.912	7.241	0.361	5.51
268	0	63	7	0	0	0	1	0	1.09	1.31	3.08					4.68
269	1	68	23	1	1	0	1	0	2.37	1.34	5.06	8.1	1.539	6.164	0.284	6.91
270	0	43	6	0	1	0	1	0				5.5	1.755	3.344	0.369
271	0	63	4	1	0	0	1	0	1.45	1.19	3.73					5.29
272	1	53	8	0	1	0	1	0	1.87	1.36	4.82	5.9	1.304	4.083	0.437	6.28
273	1	72	17	1	1	1	1	0	1.22	1.27	3.58	12.3	1.784	9.914	0.431	5.12
274	1	66	7	1	0	0	1	0	1.97	1.11	3.24					4.63
275	0	45	5	1	0	0	1	0	1.2	1.93	3.73	7.1	1.91	4.651	0.447	5.78
276	1	53	14	1	1	0	1	1	1.19	1.44	6.57	22.1	0.707	20.73	0.641	7.84
277	1	54	6	1	1	0	1	0	1.05	1.62	4.18	6	1.608	4.056	0.312	5.91
278	0	50	6	1	1	0	1	0	1.51	1.07	1.86	14.7	1.691	12.392	0.456	3.32
279	0	42	9	1	0	0	1	0	0.78	1.1	2.65	9.2	2.962	5.29	0.727	3.85
280	1	53	11	1	0	0	1	0	5.02	0.82	2.14	5.6	1.417	3.623	0.398	4.76
281	1	62	7	1	1	0	1	0	1.52	0.82	4.7	7.2	1.872	4.817	0.432	5.75
282	0	35	14	1	1	0	1	0	1.72	1.14	3.59	6.8	1.612	4.869	0.272	4.88
283	0	56	2	1	0	0	1	0	0.84	0.93	3.93	6.1	1.543	4.026	0.372	4.95
284	0	38	5	1	1	0	1	0
285	0	77	9	1	0	0	0	0	2.42	0.8	3.23					4.63
286	0	64	13	1	0	0	1	0	0.88	1.06	2.78	11.1	1.032	9.335	0.733	3.97
287	0	47	4	1	0	0	0	0	1.55	1.09	1.77	8.3	3.104	4.631	0.415	3.28
288	0	70	10	1	1	0	1	0	1.95	0.9	3.1	9.3	1.674	6.854	0.614	4.26
289	0	73	18	1	0	0	0	0	0.7	1.07	2.99	9.5	1.53	7.173	0.466	4.01
290	1	62	9	1	0	0	0	0	0.69	1.8	2.43					4.1
291	0	83	13	1	1	0	1	0	0.71	1.81	2.31	5	0.6	3.98	0.16	3.97
292	0	75	6	1	0	0	1	0	1.1	1.26	3.13	5.9	1.552	3.829	0.431	4.4
293	1	66	8	1	0	0	1	0	0.76	1.63	3.12					4.64
294	1	67	18	1	1	0	1	0	1.38	1.67	9.17	12.6	1.084	11.214	0.239	10.43
295	1	58	8	1	0	0	1	0	2.59	1.2	3.47	6.5	1.905	4.024	0.481	5.27
296	0	49	6	1	0	0	1	0	2.13	0.75	4.38	10.3	3.214	6.262	0.721	5.56
297	0	59	8	1	1	0	0	1	1.91	0.94	4.11	16.9	2.028	14.078	0.727	5.32
298	1	67	8	0	1	0	1	0	3.14	1.16	5.05	7.4	1.939	5.18	0.222	6.96
299	0	89	7	1	0	0	1	0	0.74	1.2	2.89	5.6	1.002	4.077	0.37	4.16
300	0	54	9	1	0	0	1	0	0.84	0.82	1.69	8.9	2.065	6.168	0.365	2.74
301	1	55	6	0	0	0	1	0	1.25	1.16	1.59	7.1	1.448	5.013	0.596	3.02
302	1	77	11	1	1	0	1	0	0.75	1.17	3	7.2	1.49	5.22	0.439	4.13
303	1	76	15	1	1	0	0	1	1.26	0.88	2.32	7.6	1.474	5.1	0.524	3.63
304	1	62	18	1	0	1	1	0	1.64	1.25	1.53	8.5	1.7	6.316	0.425	3.06
305	0	52	6	1	0	0	1	0	2.1	0.92	3.21					4.66
306	0	81	7	1	0	0	1	0	1.01	1.12	3.02	6	0.81	4.602	0.39	4.41
307	1	54	7	1	0	0	1	0
308	1	85	25	1	0	0	1	1	1.07	1.43	4.39	5.3	0.753	4.224	0.281	5.92
309	0	84	11	1	0	1	0	1	0.64	1.33	1.92	8.6	0.396	7.594	0.576	3.39
310	1	60	17	1	1	0	1	1	1.2	1.62	6.06	13.3	1.543	11.119	0.599	7.6
311	1	71	9	1	1	1	1	0	1.05	1.24	3.13	8.1	1.742	5.897	0.397	4.41
312	0	69	9	1	0	0	1	0	1.33	0.8	3	7.9	1.304	5.396	0.727	4.14
313	1	52	24	1	0	1	0	1				10.8	0.562	9.893	0.335
314	0	85	10	1	0	0	1	0	0.89	0.98	0.94	5.1	1.851	2.637	0.24	2.14
315	0	57	3	1	1	0	1	0	2.75	0.66	2.38	8.9	1.878	6.123	0.641	3.63
316	1	87	13	1	0	0	1	0	0.75	0.94	2.96	10.8	0.983	9.482	0.281	3.96
317	1	56	15	1	1	0	0	0	1.36	1.69	3.57	8.5	2.023	5.67	0.442	5.26
318	0	62	11	1	1	0	0	0	1.06	1.05	4.49	7.1	1.498	4.864	0.298	5.65
319	0	51	5	0	1	0	1	0	0.67	0.94	2.72					3.73
320	1	74	9	0	0	0	1	0	0.87	0.79	1.98	8.3	2.498	4.847	0.764	3.03
321	1	50	6	1	1	0	1	0	1.15	1.05	2.19	10.2	1.132	8.833	0.214	3.31
322	0	34	15	1	0	0	0	0				11.8	0.755	10.325	0.614
323	0	92	22	1	0	0	1	1				13.6	0.748	11.737	1.088
324	0	75	13	0	1	0	1	1	0.86	1.74	3.41	13.2	1.016	11.062	0.832	5.06
325	1	77	11	1	1	1	1	1	0.83	1.11	1.72	8.8	1.69	6.38	0.695	3.01
326	1	67	8	1	0	0	1	0	1.63	1.18	2.94	7.3	2.051	4.183	0.372	4.36
327	1	64	7	1	0	0	1	0	2.43	1.04	4.64	10.3	2.4	7.21	0.515	5.91
328	1	77	14	1	0	0	1	0	0.68	1.44	1.48	6.9	1.394	4.934	0.504	2.98
329	0	63	9	0	0	0	1	0	0.88	1.24	2.8	10.5	0.746	9.398	0.336	4.13
330	0	74	6	1	0	0	1	0	0.89	1.36	2.36	8	1.896	5.232	0.664	3.73
331	0	47	5	1	0	0	1	0	2.28	1	3.37	6.3	1.058	4.675	0.227	4.83
332	0	72	7	1	0	0	1	0	0.63	1.33	3.19	8.5	1.709	6.027	0.578	4.35
333	1	67	15	1	1	0	1	1	8.66	0.84	3.23	9.4	1.26	7.454	0.583	7.36
334	1	72	4	1	0	0	1	0	1.62	1.31	3.01	6.9	1.808	4.609	0.269	4.62
335	0	75	11	1	0	0	1	0	1.21	1.1	2.95	12.5	1.938	9.463	0.8	4.12
336	1	73	13	1	0	1	1	0	0.63	1.42	2.28	14.8	1.169	12.684	0.814	3.31
337	0	78	13	1	1	0	1	0	1.23	0.74	1.85	6.8	1.612	4.76	0.313	2.84
338	1	75	10	0	0	0	1	0	1.28	1.35	2.18	7.9	2.204	5.111	0.458	3.68
339	0	61	6	1	1	0	0	0	2.34	0.9	2.93	5.8	2.053	3.19	0.435	3.89
340	0	73	6	1	0	0	0	0	0.91	1.73	2.84	5.6	1.478	3.55	0.448	4.53
341	0	66	10	0	0	0	1	0	0.69	1.59	3.13	7.4	3.478	3.204	0.488	4.9
342	1	54	8	1	0	0	1	0	0.49	1.48	2.69	3.8	1.163	2.375	0.171	4.06
343	0	69	8	1	1	0	0	0				10.6	3.032	5.83	0.636
344	0	62	8	0	1	0	0	0	1.83	0.78	2.63	6.1	1.769	3.935	0.299	3.72
345	1	84	11	1	0	0	1	0	1.58	0.84	3.81	10.3	1.597	7.89	0.649	4.9
346	1	59	9	0	1	0	1	0	1.2	0.8	1.5	5.5	1.469	3.691	0.27	2.41
347	0	47	10	1	0	0	1	0	0.99	0.54	3.41	7.5	1.875	4.74	0.72	4.25
348	1	91	6	1	1	0	1	0	0.98	1.13	3.75	4	1.26	2.284	0.272	4.8
349	1	74	7	0	0	0	1	0	2.22	1.16	4.74	6.5	1.346	4.219	0.338	6.55
350	1	83	8	1	0	0	1	0	0.99	1.19	4.14					5.27
351	1	73	5	1	1	0	1	0	2.27	0.89	3.12	9	1.935	6.372	0.405	4.4
352	0	41	12	1	0	0	1	0	3.98	0.95	3.43					5.13
353	0	81	8	1	1	0	1	0	1.17	1.11	2.84	5.4	1.129	3.321	0.4	3.99
354	1	74	10	0	0	0	1	1	1.05	1	3.03	11.2	2.856	7.661	0.426	4.5
355	0	71	7	1	0	0	0	0	1.71	1.15	3.34	4.4	1.58	2.376	0.396	4.82
356	1	44	5	0	1	0	1	0	3.36	0.81	2.25	5.5	1.59	3.509	0.248	3.96
357	1	82	5	1	0	0	1	0	2.24	0.98	1.38	4.6	0.948	3.335	0.221	3.1
358	0	67	4	0	1	0	1	0	1.52	1.35	4.56	9.6	1.738	7.162	0.566	6.46
359	0	53	5	1	1	0	1	1	1.62	0.93	2.96	12	1.26	9.936	0.624	4.4
360	1	76	4	1	1	0	1	0	1.42	1.24	4.2	7.4	2.198	4.847	0.311	5.72
361	0	76	7	1	1	0	1	0	2.38	0.71	2.04	13.1	1.585	10.899	0.498	3.69
362	1	75	6	1	1	0	1	0	2.01	0.83	3.24	7.2	2.11	4.536	0.331	4.82
363	0	52	14	1	0	0	1	0	1.19	1.69	2.92					4.86
364	0	65	7	1	1	0	1	0	1.46	0.87	2.67	9.6	2.515	5.702	0.538	4.07
365	0	77	5	0	0	0	0	0	0.56	1.46	2.98	6.1	1.043	4.209	0.458	4.56
366	1	66	10	0	1	0	1	0	2.61	0.85	5.14	7.1	2.293	4.154	0.412	7
367	0	67	18	1	0	0	1	1	1.86	0.68	3.84	8.6	1.445	6.674	0.396	5.02
368	0	37	9	1	1	0	1	0	2.73	0.73	3.03	11.1	2.353	8.192	0.366	4.79
369	1	71	10	0	1	0	1	0	4.03	1.34	3.34	5.1	2.035	2.213	0.459	5.93
370	0	83	10	1	0	0	1	1	1.17	1.52	3	7.4	1.191	5.52	0.466	4.55
371	1	68	5	0	0	0	1	0	2.03	1.29	3.4	7.6	2.12	4.864	0.388	5.05
372	0	49	14	1	1	0	1	0	2.58	1.03	3.56	8.7	2.453	5.368	0.496	5.27
373	1	68	8	1	1	0	1	0	1.13	1.15	2.38	6.9	1.704	3.56	1.628	3.8
374	1	34	10	1	1	0	0	0	1.52	0.79	2.65	11.6	2.564	8.282	0.51	3.73
375	1	65	12	1	1	0	0	0	2.51	1.01	2.99	6.7	1.065	5.253	0.348	4.6
376	1	69	4	1	0	0	1	0				11.2	2.509	7.851	0.706
377	0	58	6	1	0	0	0	0	2.01	1.36	3.41					5.24
378	1	54	6	1	0	0	0	0	1.24	1.2	1.92	5.1	1.607	2.978	0.342	3.31
379	1	70	12	1	1	0	1	0	1.96	0.93	1.82	6	1.47	3.936	0.366	3.45
380	0	50	2	1	0	0	1	0	2.08	1	3.96	9.2	1.334	7.526	0.304	5.26
381	1	42	7	1	0	0	1	0	0.89	1.26	2.84	6.6	0.772	5.603	0.172	4.12
382	0	67	6	1	0	0	1	0	1.1	1.34	3.75	6.9	2.284	3.816	0.38	5.21
383	0	58	8	1	0	1	1	0	0.92	1.36	3.61	12.2	1.574	9.601	0.964	4.97
384	1	78	24	0	0	0	1	0	1.45	1.59	4.03	5.2	1.321	3.526	0.192	6
385	0	51	10	1	1	0	1	0				10.7	0.546	9.705	0.3
386	0	69	8	1	0	0	1	0	0.87	1.66	4.1	5.3	1.431	3.519	0.249	5.89
387	0	53	12	1	0	0	1	0	5.02	0.63	2.49	9.1	2.475	5.733	0.564	4.62
388	1	69	13	1	0	0	1	0	0.5	1.73	2.68	7	0.455	6.419	0.112	4.23
389	0	59	2	1	0	0	1	0	2.26			13.7	6.521	6.206	0.438	6.4
390	0	67	8	1	0	0	1	0	0.78	1.16	3.31					4.47
391	0	71	10	1	0	0	1	0	1.21	1.37	4.59					6.04
392	0	57	9	1	0	0	1	0	1.75	1	4.39					5.6
393	0	64	7	1	0	0	1	0	1.14	1.03	2.99	10.7	2.964	6.741	0.76	4.23
394	0	58	12	0	1	0	1	0	0.83	1.05	2.89	11.1	3.374	7.004	0.644	3.94
395	0	64	9	1	0	0	1	0	1.68	1.54	2.35	5.5	0.732	4.208	0.413	4.41
396	1	69	7	1	1	0	1	0	1.94	1.18	2.7	6.7	1.447	4.764	0.402	4.5
397	0	71	8	0	0	0	1	0	1.32	1.31	3.33	6.3	1.235	4.454	0.441	5.14
398	0	56	4	1	0	0	1	0	1.09	1.33	2.2	6.5	2.275	3.569	0.397	3.7
399	1	56	8	1	0	0	1	0	0.45	1.53	2.55	5	1.605	3.02	0.315	4.1
400	1	78	9	1	0	0	1	0	1	1.47	2.79	12.8	0.486	11.763	0.525	4.47
401	0	70	10	1	0	0	1	0	0.7	1.36	3	10.3	2.266	7.344	0.494	4.52
402	0	73	7	1	1	0	1	0	0.99	1.1	2.77					4.18
403	1	78	7	1	1	0	1	0	1.06	1.11	2.59	9.1	0.319	8.29	0.482	4.13
404	1	49	5	1	0	0	0	0	1.87	1.37	3.28					5.08
405	0	59	8	1	0	0	1	0	1	1	2.78	15.3	0.995	14.137	0.153	4.18
406	1	68	8	1	1	0	1	0	0.98	1.4	4.44	8.2	2.009	5.699	0.451	5.9
407	1	66	5	1	0	0	1	0	2.58	1.03	3.57	6.8	2.53	3.726	0.408	5.43
408	1	69	11	1	0	0	1	0	2.71	1.2	2.61	9.1	1.866	6.698	0.464	4.61
409	0	58	4	0	1	0	1	0	3.56	0.79	1.93	7.9	1.643	5.814	0.356	3.89
410	0	75	10	0	0	0	0	0	0.67	1.09	2.14	12.7	1.803	9.538	0.597	3.45
411	0	40	3	1	0	0	1	0	1.66	1.75	2.83	8.5	1.139	7.166	0.17	4.88
412	0	55	10	1	0	0	1	0	2.15	1.35	3.74					5.82
413	1	67	13	1	1	0	0	0	1.43	1.1	1.06	7.3	1.723	5.249	0.277	2.57
414	0	75	6	1	1	0	1	0	1.78	1.1	2.09	7.8	2.028	4.961	0.429	3.78
415	1	49	16	1	0	0	1	0	1.12	1.28	3.36	8.2	1.394	6.38	0.336	4.88
416	1	64	9	1	0	0	1	0	1.27	1.33	4.87	7	1.799	4.739	0.399	6.65
417	0	77	12	1	1	0	1	0	1.02	0.79	1.45	6.5	1.489	4.362	0.41	2.65
418	1	60	15	1	1	0	1	0	1.75	1.46	3.43	4.5	1.112	3.231	0.14	5.49
419	1	72	6	0	1	0	0	0	1.27	1.09	1.35	7.2	1.274	5.479	0.331	2.85
420	0	53	6	1	0	0	1	0	1.87	1.02	2.76	7.6	1.756	5.092	0.532	4.51
421	0	65	17	1	1	0	1	0	3.05	1.01	3.57	5.2	1.196	3.442	0.411	5.85
422	0	48	9	1	0	0	1	0	0.6	1.36	3.04	6.7	2.097	3.765	0.422	4.54
423	0	48	9	1	1	0	1	0	0.85	0.88	1.46	9.1	3.039	5.342	0.473	2.79
424	0	41	10	1	0	0	1	0	0.89	1.21	1.68	10.8	1.771	8.402	0.497	3.32
425	0	62	12	1	1	0	1	0	1.6	1.32	4.47	7.4	1.769	5.084	0.459	6.29
426	0	72	10	1	1	1	1	0	2.43	1.25	3.47					5.5
427	1	88	10	1	1	0	1	0	1.78	1.25	2.42	4.5	1.053	3.069	0.297	4.24
428	0	71	11	1	0	0	1	0	1.65	1.31	2.77	12.9	0.864	11.713	0.31	4.42
429	1	60	14	0	0	0	1	0	1.42	1.29	2.05	7	2.891	3.633	0.392	3.91
430	0	81	6	1	1	0	1	0	0.91	0.83	1.99	6.7	0.596	5.789	0.281	3.08
431	0	51	9	1	1	0	1	0	4.62	0.82	2.44					4.44
432	0	45	13	1	1	0	1	0	2.86	1.24	5.11	6.1	2.105	3.288	0.458	7.34
433	0	71	11	1	0	0	1	0	1.04	1.06	1.62	5.9	1.522	3.334	0.507	2.99
434	1	67	10	1	0	0	1	0	0.7	1.39	2.77	6	1.548	4.014	0.288	4.18
435	0	69	11	1	0	0	1	0	1.99	1.11	3.44	6.5	1.502	4.108	0.449	5.06
436	0	65	8	1	0	0	1	0	0.45	1.11	1.75	15.6	0.718	14.461	0.406	2.9
437	0	66	8	1	0	0	1	0	1.81	1.07	3.02	10	1.83	7.67	0.3	4.7
438	1	51	8	1	0	0	1	0	1.17	0.95	2.68	6.6	0.97	5.306	0.29	4.16
439	0	42	26	1	0	0	1	0	0.89	1.06	2.9					4.28
440	1	33	4	0	0	0	0	0	0.48	1.26	1.7	3.5	1.148	2.128	0.182	2.96
441	0	69	4	0	0	0	1	0	2.41	1.12	3.1	5.9	1.28	4.183	0.33	5.31
442	0	57	7	0	1	0	0	0	1.15	1.52	2.74	6.9	1.649	4.768	0.311	4.56
443	1	78	21	1	1	0	1	0	1.65	1.3	3.15	12.3	1.132	10.455	0.652	4.99
444	0	53	22	1	1	0	1	0	1.44	1	1.67					3.18
445	0	62	12	1	1	1	1	0	4.34	0.78	2.98	7	1.253	5.236	0.392	6.28
446	0	56	11	1	0	0	1	0	1.1	1.35	4.14	8.4	1.394	6.426	0.487	5.75
447	0	58	8	1	0	0	1	0	0.59	1.21	2.02	8.7	1.296	6.716	0.618	3.31
448	1	62	10	1	1	0	0	0	1.96	1.2	4.79	10.9	3.216	7.074	0.567	6.48
449	0	48	7	1	0	0	1	0	1.4	0.97	4.22	5.8	0.986	4.42	0.313	5.65
450	0	46	11	1	1	0	1	0	1.38	0.66	3.49	9.1	1.729	6.543	0.419	4.64
451	0	79	8	1	0	0	1	0	0.78	1.13	2.18	4.5	1.332	2.642	0.365	3.56
452	1	59	7	1	0	0	1	0	2.18	0.82	1.61					3.53
453	0	67	7	1	0	0	1	0	4.8	0.68	1.77	5.3	1.691	3.058	0.329	4
454	0	58	7	1	0	0	1	0	1.87	0.98	2.29	10.1	2.727	5.939	0.475	4.08
455	0	60	8	1	0	0	1	0	3.8	0.81	1.9					3.98
456	0	65	8	0	0	0	1	0	1.39	1.15	3.7	6.9	0.794	5.403	0.511	5.18
457	1	49	7	1	0	0	1	0	1.47	1.04	2.23	6.3	1.928	3.887	0.391	3.75
458	0	47	6	1	1	0	0	0	2.85	0.84	3.16	7	2.163	4.235	0.462	4.94
459	0	49	7	1	0	0	1	0	0.99	1	4.16	8.6	1.608	6.338	0.516	5.75
460	0	38	17	1	0	0	1	0	1.32	0.87	1.82	6.2	1.823	3.838	0.415	3.14
461	0	69	14	1	0	0	0	0	1.7	1	3.75	5.3	1.526	3.026	0.567	5.35
462	0	51	8	1	1	0	1	0	0.97	1.22	3.56	7.4	3.789	3.041	0.318	5.04
463	0	47	4	1	0	0	1	0	1.45	0.79	2.96	7.8	1.841	5.515	0.39	4.14
464	0	64	6	1	1	1	1	0	1.26	1.3	3.48	6.4	1.606	4.077	0.544	5.07
465	0	46	4	1	1	0	0	0	1.59			4.9	1.803	2.7	0.309	5.54
466	0	42	14	1	0	0	1	0	2.75	0.84	2.71	9.9	1.129	7.91	0.614	4.55
467	0	80	10	0	0	0	1	0	1.51	0.82	1.74	5.2	1.56	3.302	0.276	3.09
468	1	60	8	1	0	1	0	0	0.68	2.02	2.46	4.5	1.737	2.381	0.297	4.6
469	1	48	7	1	0	0	1	0	1.62	1.06	2.94					4.62
470	0	83	12	1	0	1	1	0	0.67	0.97	2.21	14.5	0.827	12.992	0.667	3.41
471	0	52	7	1	0	0	1	0	2.03	1.33	1.57	6.9	1.801	4.761	0.297	3.43
472	0	53	12	1	0	0	1	0	0.63	1.5	2.45					4.18
473	0	62	6	1	0	0	1	0	1.68	1.02	2.5	8.9	1.825	6.426	0.436	3.83
474	1	49	23	1	1	0	1	0				9.5	1.14	8.094	0.247
475	0	48	7	1	1	0	1	0	2.1	1.02	4.27	5.8	1.879	3.393	0.36	5.97
476	0	62	8	1	1	0	1	0	1.03	1.41	3.55	8.2	0.476	7.528	0.189	5.02
477	1	71	7	1	1	1	1	0	2.05	1.46	5.97	6.2	1.624	4.098	0.366	7.97
478	1	72	10	1	0	0	1	0	1.71	1.07	3.64	5.7	1.516	3.682	0.291	5.32
479	1	50	10	1	1	0	1	0	2.27	0.92	3.8	7.4	1.672	5.113	0.474	5.47
480	0	77	18	1	1	1	1	0	0.78	0.94	3.54	6.2	1.073	4.501	0.372	4.84
481	0	62	9	1	0	0	1	0	1.28	1.12	3.18	5.9	2.307	3.033	0.313	4.78
482	0	66	8	0	0	0	1	1	2.36	0.73	5.24	7.4	1.798	4.825	0.54	7.03
483	1	62	20	0	1	0	1	0	1.76	0.84	1.73	5.4	1.949	2.975	0.302	3.23
484	0	64	6	1	0	0	0	0	1.03	1.1	3.06	6.7	1.621	4.422	0.409	4.57
485	0	71	6	1	0	0	1	0	3.78	0.53	2.6	6.1	2.166	3.068	0.506	4.54
486	0	88	11	0	1	0	1	0	1.58	1.08	5.96	6.5	1.495	4.433	0.436	7.75
487	1	63	7	1	1	0	1	0				5.2	1.357	3.479	0.302
488	0	82	8	1	0	0	1	0	1.48	1.28	4.03	5.3	1.659	3.169	0.27	5.86
489	0	53	12	1	0	0	1	0	1.12	1.08	2.68					4.19
490	0	53	14	1	1	0	1	0	1.05	1.17	2.6					4.25
491	0	67	10	1	1	0	1	0	1.66	1.05	2.99					4.55
492	1	69	18	1	1	0	1	1				6.8	1.442	5.025	0.313
493	0	55	5	1	0	0	1	0	2.19	0.78	3.37	6	2.37	3.036	0.51	4.88
494	0	61	8	1	1	0	1	0	1.28	0.88	2.09	6.2	2.009	3.621	0.341	3.32
495	0	70	9	1	1	0	1	0	6.24	1	4.29	6.7	1.903	4.322	0.322	7.57
496	1	56	21	1	1	0	1	0	2.77	1.25	5.25	5.3	1.314	3.556	0.371	8.27
497	1	78	5	1	0	0	1	0	1.92	1.14	3.16	7.8	2.051	5.07	0.413	5.04
498	0	52	9	1	1	0	1	0	1.45	0.84	3.45	12.8	1.779	10.253	0.678	4.76
499	1	72	9	1	1	0	0	0	2.01	1.38	3.41	8.6	1.6	6.527	0.439	5.32
500	1	66	10	0	0	0	1	0	0.74	1.07	2.3	5.5	1.958	3.13	0.341	3.62
501	0	58	4	0	1	0	1	0	6.23	0.89	3.6	8.6	2.941	4.919	0.559	6.71
502	0	47	8	0	1	0	0	0	1.06	1.08	1.72	9.9	2.435	6.425	0.97	3.28
503	0	74	20	1	1	1	1	0	1.01	1.17	3.61					5.31
504	0	58	6	1	0	0	1	0	1.2	0.73	1.91					3.05
505	0	64	6	0	0	0	0	0	1.12	1.2	2.47	4.8	1.33	3.13	0.302	4.06
506	1	63	8	1	0	0	1	0	0.72	1.36	2.5	12.3	1.156	10.553	0.529	4.1
507	0	56	16	1	1	0	1	0	1.28	1.08	1.61	7.1	1.839	4.743	0.44	3.04
508	0	63	7	1	0	0	1	0	1.09	0.88	2.02	4	0.86	2.704	0.284	3.37
509	0	60	18	1	0	0	1	0	1.02	0.86	2.79					4.02
510	0	54	11	0	0	0	1	0	2.14	0.78	3.19	10.3	2.647	6.788	0.587	4.79
511	0	70	15	1	0	0	1	0	0.73	1.75	2	6.2	1.296	4.055	0.651	4.15
512	0	67	17	1	0	0	1	0	1.02	1.12	2.07	11.8	0.885	10.325	0.448	3.46
513	0	54	6	1	1	0	1	0	2.4	0.77	2.47	6.8	2.285	3.924	0.462	4.15
514	1	66	7	1	1	0	1	0	1.25	1.13	2.75	6.1	1.092	4.624	0.323	4.35
515	0	68	11	1	0	0	1	0	1.43	0.84	3.23	5.1	1.53	3.024	0.485	4.62
516	1	64	7	0	1	0	1	0	2.23	1.13	2.56	9.3	2.074	6.724	0.456	4.32
517	1	61	9	0	0	0	1	0	1.55	0.97	3.95	7.2	2.405	4.464	0.259	5.49
518	1	83	8	0	1	0	1	0	3.01	0.99	1.57	7.6	2.067	4.841	0.456	3.63
519	1	74	10	1	0	0	1	0	2.04	1.04	4.6	8.4	0.966	7.073	0.344	6.3
520	1	79	11	1	0	0	1	0	1.2	1.26	3.02					4.64
521	1	74	11	1	0	0	1	0	0.87	1.57	3.52	5.9	1.676	3.729	0.419	5.33
522	0	74	14	1	0	0	1	1	0.64	2.04	2.36	6.9	2.063	4.03	0.497	4.53
523	0	50	9	1	0	0	1	0	2.27	1.31	2.44	12.1	2.481	8.615	0.702	4.31
524	0	96	17	1	0	0	1	1	0.49	1.22	2.51	4.7	1.081	3.093	0.428	3.65
525	1	44	9	1	0	0	1	0	1.07	1.58	3.6	8.1	1.134	6.496	0.397	5.46
526	0	57	2	1	1	0	1	0	0.89	0.87	3.07	5.9	1.693	3.682	0.372	4.23
527	0	74	11	1	1	0	1	0	2.19	0.8	4.56	5	1.215	3.205	0.38	6.12
528	0	48	14	1	0	0	0	0	1.11	1.41	3.04	12.9	1.471	10.746	0.632	4.6
529	0	46	25	1	0	0	1	0	1.45	0.76	6.42	5	1.46	3.035	0.415	7.71
530	1	53	5	1	1	0	0	0	1.12	0.89	3.28	8.8	2.015	6.354	0.29	4.5
531	1	61	4	1	1	0	1	0	5.23	0.66	1.03	5.7	1.072	4.349	0.2	3.34
532	0	48	9	1	0	0	0	0	0.73	1.23	3.23	6.2	1.476	4.098	0.49	4.63
533	0	65	17	1	0	0	1	1	0.76	0.8	1.9	15	0.48	13.8	0.63	3.01
534	0	54	8	1	0	0	1	0	2.44	0.7	3.64	7.7	2.595	4.158	0.747	5.18
535	1	74	8	0	1	0	1	0	5.01	0.76	1.97	6.4	1.67	4.365	0.294	4.29
536	1	58	9	1	0	0	1	0	1.7	1	3.36	6.2	1.922	3.875	0.298	4.69
537	0	40	17	1	0	0	1	0	1.48	1.23	4.3	12.1	0.666	11.277	0.133	5.88
538	0	88	11	1	0	0	0	1	0.58	2.11	4.52	12.1	0.605	10.491	0.956	6.5
539	0	74	14	1	1	0	1	0	1.14	1.14	4.28	7.1	2.3	4.047	0.419	5.55
540	0	63	15	1	1	0	1	0	1.31	1.01	3.26					4.68
541	0	62	11	0	0	0	1	0				7.8	1.568	5.429	0.437
542	0	63	8	1	0	0	1	0	1.29	0.83	2.87	7.7	2.256	4.782	0.547	3.94
543	0	51	10	1	0	0	1	0	1.69	1.03	3.05	5.5	1.271	3.641	0.308	4.41
544	0	58	6	1	0	0	1	0	0.55	1.11	3.25	4.3	1.058	2.877	0.297	4.42
545	1	48	9	1	0	0	1	0	3.08	0.82	2.54	7.1	1.342	5.361	0.312	4.09
546	0	55	16	1	0	0	1	0	1.47	1.12	3.61	10.1	1.252	8.272	0.434	4.89
547	0	58	11	1	1	0	1	0	1.34	1.3	3.74	14.9	1.445	12.516	0.745	5.2
548	0	63	3	0	1	0	1	0	9.27	0.63	1.45	9	2.034	5.85	0.648	4.82
549	0	48	6	1	0	0	1	1	1.13	1.12	5.18	9	1.323	6.795	0.819	6.39
550	0	56	7	0	0	0	1	0	3.44	0.96	2.22	7.8	1.88	5.374	0.491	3.99
551	0	72	12	1	0	0	1	0	1.54	0.63	4.32	5.3	0.896	3.943	0.339	5.21
552	0	82	9	0	0	1	0	0	1.41	1.14	4.57	6.7	1.226	4.797	0.469	5.79
553	0	58	7	1	0	0	1	0	4.04	0.6	4.09	6	1.572	3.168	0.558	5.77
554	0	72	6	1	0	0	0	0	0.57	1.6	3.71					5.23
555	1	68	6	1	0	0	1	0	1.64	0.67	3.02	8.7	1.462	6.856	0.348	4.08
556	0	56	8	1	1	0	1	0	3.87	1.22	4.07	10.4	1.425	8.414	0.437	5.95
557	0	56	4	1	0	0	1	0	1.97	1.38	4.76	5.3	1.585	3.069	0.387	6.63
558	1	54	12	1	1	0	0	0	2.23	1.31	3.65	8.7	1.114	7.378	0.191	5.41
559	0	48	12	1	1	0	0	0	1.89	1.04	3.35	7.8	1.482	5.663	0.562	5.04
560	0	57	4	1	0	0	1	0	1.35	1.28	3.79					5.43
561	1	59	3	1	0	0	1	0	2.42	1.35	2.26	6.2	1.252	4.569	0.279	4.16
562	0	53	9	0	0	0	1	0	1.82	0.77	3.05	8.1	1.345	6.156	0.478	4.36
563	0	53	6	0	0	0	0	0	0.71	1.54	3	6.9	2.077	4.154	0.462	4.67
564	0	55	10	1	0	0	0	0	1.33	0.71	4.38	9.6	2.611	5.914	0.624	5.55
565	1	52	15	1	0	0	1	0	1	1.76	4.46	7.2	0.799	6.25	0.108	6.37
566	1	78	6	0	0	0	1	0	1.11	1.22	4.64	6.4	2.048	3.859	0.39	6.14
567	0	67	8	1	0	0	1	0	1.4	1.12	2.97	6.6	1.584	4.422	0.343	4.58
568	0	56	9	1	1	0	0	0	2.04	0.93	1.04					2.89
569	1	73	18	1	1	0	1	1	2.93	1.03	3.77	10.8	1.922	8.446	0.346	5.61
570	1	75	15	1	1	0	1	0				11.5	0.851	9.833	0.495
571	0	50	10	1	0	0	1	0	1.21	1.42	3.69					5.37
572	0	58	9	1	0	0	0	0	1.67	1.03	2.75					4.33
573	0	57	6	1	0	0	1	0	1.35	1.37	2.94	6	1.926	3.288	0.504	4.68
574	0	79	8	1	0	0	1	0	1.49	1.14	3.15	5.7	1.967	3.084	0.519	4.52
575	1	44	9	1	1	0	1	0	1.53	0.92	4.43	9.8	2.881	6.311	0.47	5.95
576	0	76	15	1	1	0	1	0	0.54	1.6	2.14	6	1.062	4.422	0.396	3.82
577	0	64	9	0	0	0	0	0	1.17	1.14	3.3	6.6	1.921	4.039	0.409	4.78
578	1	57	22	1	0	0	1	0	0.78	1.31	2.83	5.2	1.118	3.723	0.27	4.41
579	0	50	12	1	0	0	1	0	1.84	0.76	3.03					4.14
580	1	68	4	1	0	0	1	0	0.88	1.16	4.65	6.2	0.794	5.096	0.254	6.02
581	0	54	7	0	0	0	0	0	2.38	0.9	2.43	7.9	2.046	5.238	0.419	4.03
582	0	46	6	1	0	0	1	0	3.17	0.96	3.09	8.1	0.932	6.407	0.332	4.92
583	0	68	17	1	1	0	1	0	2.61	1.12	3.43	3.9	1.97	1.49	0.3	5.5
584	0	49	11	1	1	0	1	0				8.9	1.798	6.426	0.641
585	0	47	5	0	0	0	1	0	2.48	0.77	2.94	5.2	1.581	3.271	0.317	4.52
586	0	43	13	1	0	0	1	0	1.58	1.18	2.66					4.43
587	0	51	5	1	0	0	0	0	0.77	1.37	2.95	8.6	2.623	4.739	0.688	4.53
588	0	80	10	1	0	0	1	0	4.97	1	3.66	7.4	1.243	5.557	0.444	6.04
589	1	69	13	1	0	0	1	1	1.82	1.48	4.18	4.9	0.745	3.739	0.289	6.15
590	1	90	19	1	0	1	1	0	1.74	0.83	2.88	7.6	0.798	6.171	0.524	4.14
591	0	57	7	1	0	0	1	0	1.07	0.74	2.61	7.8	1.443	5.6	0.64	3.71
592	0	60	24	1	0	0	1	0	1.07	0.88	3.14					4.29
593	0	58	8	1	0	0	1	0	4.03	1.08	4.97	6.8	2.142	3.862	0.537	7.9
594	0	67	9	1	0	0	1	0	1.44	1.08	2.29	5.4	2.295	2.522	0.394	3.7
595	0	44	7	1	0	0	1	0
596	0	54	4	1	0	0	1	0	0.71	0.92	2.04					3.24
597	1	64	8	1	0	0	1	0	1.84	1.15	2.05	6.7	2.312	3.752	0.516	3.63
598	0	66	10	0	1	0	1	0	1.37	1.1	2.97	5.9	1.805	3.57	0.401	4.37
599	1	59	26	1	1	0	1	1	4.56	0.18	0.28	21.9	0.416	21.002	0.46	2.8
600	1	77	5	1	0	0	1	0	0.72	1.62	1.82	11.6	0.916	10.231	0.383	3.56
601	0	77	13	1	1	0	1	0	1.96	1	2.43	5.5	1.48	3.119	0.369	4.08
602	0	47	6	1	1	0	1	0	2.88	0.81	2.03	17.5	3.955	12.513	0.98	3.82
603	0	53	11	1	1	0	1	0	1.72	0.68	1.9	8.7	0.713	7.682	0.252	3.02
604	1	57	5	1	1	0	1	0	2.28	1	3.14	5.9	1.929	3.493	0.36	4.91
605	1	59	6	1	0	0	1	0	1.61	1.15	3.41	7.9	1.098	6.47	0.269	5.01
606	1	74	14	0	0	0	1	0	1.76	0.92	3.63	6.9	1.939	4.34	0.469	4.97
607	0	62	7	1	0	0	1	0	2.46	1.13	4.25	5.8	1.386	3.642	0.365	6.08
608	0	73	9	1	0	1	1	0	0.85	1.1	3.35	10.2	1.102	8.619	0.459	4.7
609	0	55	6	1	0	0	0	0				8.2	2.444	4.83	0.361
610	0	56	15	1	0	0	0	1	1.07	1.01	3.48	7.7	0.37	7.022	0.277	4.79
611	0	38	8	1	0	0	1	0	1.73	0.91	3.8	10.2	1.836	7.915	0.337	5.26
612	0	55	16	1	1	0	1	0	1.56	0.92	3.44	9.6	3.83	4.781	0.595	4.93
613	0	73	15	1	0	0	1	1				8.1	0.527	7.241	0.259
614	0	65	7	1	1	0	0	0	1.5	0.89	2.2	10.4	3.359	6.084	0.728	3.63
615	0	87	16	1	0	0	1	1	0.77	1.13	1.57	8	2.616	4.224	0.776	2.9
616	1	71	9	1	0	0	1	0	1.69	1.13	3.36	5.7	1.112	4.338	0.211	4.91
617	0	64	9	1	1	0	1	0	1.1	1.68	5.58					7.49
618	1	76	10	1	0	0	1	0	1.83	1.57	4.49	11.6	3.538	7.111	0.812	6.35
619	0	48	6	1	1	0	1	0	1.61	1.11	2.95	7.8	2.036	5.086	0.468	4.64
620	0	47	9	1	0	0	1	0	2.69	1.2	5.77					8.43
621	0	47	7	1	0	0	1	0	0.62	1.24	2.73					4.17
622	0	58	7	1	0	0	1	0	1.3	1.04	3.61	5.4	1.615	3.316	0.297	5.09
623	1	60	13	0	0	0	1	0	1.64	0.95	3.27	4.5	1.35	2.781	0.297	4.58
624	0	53	8	1	0	0	1	0	1.15	1.73	4.98	9.3	1.228	7.654	0.409	6.65
625	0	67	6	1	1	1	1	0	2	1.04	2.59	10.1	2.252	7.06	0.545	4.12
626	1	50	12	1	1	0	1	0	2.61	0.96	2.9	6.6	1.36	4.798	0.37	4.63
627	0	62	5	0	1	0	1	0	1.82	1.21	2.78	6.8	1.353	4.726	0.428	4.6
628	1	76	5	0	1	0	1	0	5.58	0.87	2.72	8.6	3.38	4.653	0.37	5.65
629	0	74	6	1	1	0	1	0	1.16	0.95	2.69					3.92
630	0	46	6	1	0	0	1	0	3.73	0.98	2.58					4.56
631	0	72	11	1	1	0	1	0	1.44	1.12	3.5	6	1.836	3.546	0.348	4.95
632	1	51	10	1	1	0	1	0	2.98	0.79	3.76	5.8	1.172	4.42	0.18	5.41
633	0	58	17	1	0	0	1	1				10.8	1.372	8.748	0.497
634	0	61	17	1	0	0	1	0	9.37	0.86	2.35	10.3	2.287	7.2	0.618	5.68
635	0	34	7	1	0	0	0	0	1.15	0.82	2.89	12	1.776	9.636	0.516	4.09
636	1	45	9	1	0	0	1	0	1.15	1.33	4.14					5.68
637	0	48	9	1	1	0	1	1	2.53	0.77	5.56	8.4	1.226	6.644	0.361	7.35
638	1	67	4	1	1	0	0	0	1.1	1.4	2.61	9.9	1.455	7.772	0.574	4.28
639	0	63	6	1	0	0	1	0	1.5	0.78	3.08	7.4	1.798	4.921	0.629	4.44
640	0	71	4	1	1	0	1	0	2.4	0.8	2.05	7.3	2.467	4.154	0.431	3.55
641	0	47	19	1	1	0	1	0	2.72			10.2	2.213	7.579	0.306	3.43
642	0	50	4	1	0	0	1	0	1.61	0.99	2.87					4.47
643	0	77	12	1	0	0	1	0	0.97	0.94	3.7	6	0.75	4.788	0.378	5.27
644	1	56	4	1	0	0	1	0	1.05	0.9	3.36					4.48
645	0	68	4	1	1	0	1	0	1.02	1.09	3.12	2.5	0.505	1.54	0.178	4.58
646	0	69	7	1	1	0	1	0	1.11	1.64	3.76	5.9	0.873	4.72	0.26	5.68
647	0	73	12	1	1	0	1	1	0.92	1.12	2.34	7.3	1.694	4.519	0.555	3.74
648	0	59	14	1	0	0	0	0	1.6	0.74	2.02	5.9	1.835	3.286	0.519	3.32
649	0	50	8	1	0	0	1	0				7.3	2.409	4.292	0.358
650	0	66	9	0	0	0	1	0	0.67	1.43	1.89	7.5	2.243	4.598	0.42	3.63
651	1	42	7	1	0	0	1	0	1.45	1.42	4.37	9.4	1.006	7.727	0.602	6.14
652	1	65	18	1	1	0	1	0	0.65	1.81	2.58	6.5	1.105	5.096	0.182	4.35
653	0	52	7	1	0	0	0	0	0.97	0.89	3.76	9.2	3.68	4.637	0.644	4.8
654	1	47	7	1	0	0	1	0	0.51	1.22	3.25	7.2	1.894	4.889	0.288	4.55
655	0	56	8	1	0	0	1	0	1.21	1.24	1.81					3.43
656	0	79	15	1	0	0	0	0
657	0	69	17	1	1	0	1	0				8.9	1.584	6.497	0.579
658	0	52	9	1	1	0	1	0	2.05	0.82	3.21	7.9	2.007	5.151	0.482	4.54
659	0	57	9	1	0	0	0	0
660	0	65	12	1	1	0	1	0	1.88	0.88	3.03	7.9	0.845	6.794	0.245	4.49
661	0	67	13	1	0	0	1	0	0.81	1.14	2.65	6.6	1.709	4.33	0.383	4.08
662	0	59	15	1	0	0	1	0	1.19	0.83	3.5	7.1	1.917	4.381	0.454	4.66
663	1	85	6	1	1	0	1	0	1.31	1.19	3.61	8.8	1.417	6.952	0.361	5.17
664	1	80	6	1	1	0	1	0	1.82	1.34	3.08	7.5	2.123	4.59	0.42	4.99
665	0	50	12	1	0	0	1	0	2.55	1.3	2.88	5.8	1.23	4.211	0.331	4.66
666	0	64	6	1	0	0	1	0
667	1	58	12	1	1	0	1	0	1.6	1.33	2.76	6.6	1.333	5.016	0.191	4.41
668	0	65	10	1	0	0	1	0	1.21	1.16	4.1	6.3	1.846	3.837	0.391	5.45
669	0	60	1	1	1	0	1	0	0.93	1.25	2.65	10	0.77	9	0.2	4.03
670	1	87	26	1	1	0	1	1	1.19	1.6	2.36	10.6	2.459	7.017	0.562	4.21
671	0	67	9	1	1	0	1	0	3.21	0.64	1.43	7.7	1.417	5.413	0.77	3
672	0	66	11	1	1	0	1	0	0.94	1.4	1.35	6.4	1.331	4.634	0.282	3.13
673	0	74	11	1	0	0	0	0	0.51	1.34	5.71	6.3	2.117	3.515	0.536	7.31
674	0	45	6	1	0	0	1	0	0.86	0.86	3.62					4.78
675	1	50	10	1	1	0	0	0	1.03	0.88	1.77	8.9	2.243	6.239	0.374	2.96
676	0	62	19	0	0	0	1	0	0.99	0.97	2.74	4.2	0.626	2.785	0.403	4.04
677	0	68	11	1	0	0	1	0	1.59	1.13	3.64	7.2	1.642	4.831	0.454	5.12
678	0	48	5	1	0	0	1	0	1.6	1.48	4.88	8	1.072	6.8	0.112	6.69
679	0	77	7	1	0	0	0	0	0.92	1.08	3.81	8.1	1.207	6.407	0.316	5.1
680	1	70	15	1	1	0	1	0	4.5	0.94	3.97	8.1	2.786	4.674	0.356	6.29
681	0	56	5	1	0	0	1	0	3.58	0.82	2.36					4.18
682	0	46	5	0	0	0	1	0	1.93	0.84	3.54	8	1.976	5.296	0.512	4.83
683	0	50	20	1	0	0	1	0	0.75	1.02	1.97	10	1.35	8.07	0.52	3.17
684	0	78	10	1	1	0	1	0	0.67	0.81	2.96	8.1	2.033	4.868	0.502	3.93
685	1	58	8	1	0	0	0	0	5.3	0.74	3.31	7.4	1.243	5.765	0.333	8.39
686	0	55	4	1	0	0	1	0	1.32	0.7	4.46	8.9	2.047	6.212	0.605	5.6
687	0	63	7	0	0	0	1	0	1.13	1.38	1.55	8.2	0.959	6.568	0.508	3.2
688	1	87	10	1	0	0	1	0	1.62	0.85	4.75	5.8	1.375	4.031	0.325	6.16
689	0	49	17	1	0	0	1	0	2.37	0.93	4.62					6.6
690	1	90	17	1	0	0	1	0	1.25	1.68	4.29	8.8	2.226	5.966	0.537	6.25
691	0	72	18	1	0	0	0	0	0.86	1.96	3.6					5.68
692	0	56	7	1	0	0	0	0	1.66	1.38	2.83					4.48
693	1	64	19	1	1	0	1	0	2.07	0.62	2.07	9.3	2.66	6.017	0.484	3.12
694	1	70	5	1	0	0	1	0	1.28	0.81	1.75	6.7	1.97	4.154	0.409	3.02
695	0	64	17	1	1	0	1	0	1.45	0.64	3.07	7.3	1.686	4.504	0.562	4.13
696	1	69	10	0	1	0	0	0	1.39	1.67	5.39	5.1	1.984	2.703	0.27	7.14
697	1	71	13	1	0	1	1	0	1.87	1.03	3.81	5.1	1.107	3.718	0.184	5.28
698	1	45	3	1	0	0	1	0				5.3	1.574	3.111	0.36
699	0	44	8	1	0	0	1	0	1.93	0.88	3.71	8.8	1.276	6.609	0.722	5.3
700	0	38	8	1	0	1	1	0	1.2	1.27	2.86					4.34
701	1	73	6	1	1	0	1	0	3.92	0.82	3.14	10.9	1.7	8.469	0.6	4.81
702	1	80	7	1	0	0	1	0	1.29	1.25	3.27	3.5	1.4	1.663	0.336	4.68
703	1	81	9	0	1	0	1	0	1.31	1.18	1.91	8.2	1.402	6.15	0.5	3.47
704	0	68	9	1	0	0	1	0	1.12	0.99	2.43	7.3	1.475	5.11	0.431	3.62
705	1	53	8	1	0	0	1	0	1.8	1.21	4.14	5.7	1.699	3.545	0.239	5.66
706	0	54	10	1	1	0	1	0	0.89	1.03	3.11	9	1.674	6.597	0.522	4.29
707	1	56	15	1	0	0	1	0	3.06	0.87	2.39	6.1	1.068	4.575	0.299	4.22
708	1	48	9	1	1	0	1	0	1.91	1.02	4.84	5.4	0.799	4.309	0.221	6.07
709	0	66	7	1	0	0	1	0	1.1	1.14	2.95	9.3	2.093	6.398	0.586	4.09
710	0	53	14	1	0	0	0	0	1.36	1.02	2.24					3.48
711	1	72	13	1	0	0	1	0	0.84	1.06	3.85	4.9	1.318	3.224	0.309	4.97
712	0	83	5	1	1	0	1	0	2.69	0.68	3.08	7.2	1.318	4.788	0.634	4.32
713	1	77	7	0	0	0	1	0	1.23	1.2	3.99	7.1	1.903	4.736	0.27	5.3
714	0	68	4	1	1	0	1	0	3.33	0.84	3.19	7.8	3.003	3.923	0.499	4.71
715	0	52	6	1	0	0	1	1	2.45	1.1	5.02	6.5	0.852	5.324	0.299	6.57
716	0	47	4	1	0	0	1	0	2.49	0.69	2.95	5.5	1.529	3.542	0.281	4.16
717	1	65	23	1	1	0	0	0	1.48	0.94	4.35	14.7	3.043	10.966	0.647	5.58
718	0	52	6	1	1	0	1	0	1.93	0.97	2.25	14.5	1.914	11.847	0.682	3.59
719	1	76	14	1	0	1	1	0	0.66	1.82	1.98					3.71
720	0	59	15	1	0	0	0	0	1.21	1.53	2.46					4.06
721	0	50	7	1	1	0	1	0	1.91	1.04	3.11	7	2.695	3.689	0.441	4.45
722	0	58	5	1	1	0	0	1	1.89	0.94	3.71					5.03
723	0	58	22	0	0	0	0	0	1.02	1.11	2.77	9.6	4.003	4.8	0.547	4.37
724	0	59	5	0	1	0	1	0	2.44	0.76	2.1	8.8	2.631	5.324	0.669	3.5
725	1	51	11	0	0	0	1	0	1.63	0.83	1.61	6	1.212	4.38	0.288	2.98
726	1	46	5	1	0	0	0	0	0.59	1.13	2.06	11.1	2.042	8.314	0.644	3.3
727	0	62	4	1	0	0	1	0	1.15	1.05	3.54	5.4	0.772	4.444	0.162	4.9
728	1	46	8	1	1	0	1	0	3.29	0.94	3.1	14.3	1.373	12.241	0.615	4.94
729	0	48	9	1	0	0	0	0	1.8	0.96	3.36	10.9	1.493	8.742	0.589	4.81
730	1	56	8	1	0	0	1	0	1.07	1.05	4.13	6.1	2.184	3.404	0.372	5.22
731	0	70	7	1	0	0	1	0	1.47	0.83	3.33	6.6	1.736	4.178	0.515	4.41
732	1	53	23	0	0	0	0	0	1.69	0.95	4.77	4.9	1.441	3.009	0.279	5.86
733	0	64	9	0	0	0	1	0	1.86	1.2	3.88	7.6	1.52	5.282	0.486	5.44
734	1	49	10	0	1	0	0	0	1.94	0.88	2.76	8.8	2.851	5.271	0.51	4.1
735	0	81	28	0	1	0	1	0				7.3	1.759	4.694	0.467
736	1	56	28	1	1	0	1	0
737	1	51	8	1	0	0	0	0	1.06	1.57	2.75	10.9	0.839	9.701	0.294	4.32
738	0	64	4	1	0	0	0	0	1.42	1.21	3.72					4.97
739	1	90	7	0	0	0	1	0	1.82	1.35	3.99	6.5	0.995	5.064	0.319	5.45
740	1	48	3	1	0	0	1	0	1.57	1.31	3.44	12.1	1.609	9.68	0.726	5.05
741	0	75	3	1	0	0	1	0	0.98	1.81	2.41	8.1	2.179	4.463	0.502	4.15
742	0	50	8	0	0	0	1	0	0.93	0.77	1.56	13.9	3.114	8.868	0.959	2.52
743	0	77	13	1	0	0	1	0	1.51	1.04	3.61	5.5	1.194	3.102	0.556	4.9
744	0	47	12	1	0	0	1	0	2.17	0.88	2.68					4.02
745	0	67	6	1	0	0	1	0	0.81	0.93	2.67					3.56
746	0	51	16	1	0	0	1	0	2.91	0.92	2.89	10.5	1.544	8.232	0.515	4.4
747	1	80	13	1	0	0	1	0	1.52	0.87	3.62	6.2	1.296	3.85	0.453	4.73
748	0	71	9	1	0	1	0	0	1.11	0.87	2.88	7.1	2.563	3.756	0.589	3.85
749	1	68	7	1	1	0	1	0	2.18	0.78	3.55	7	1.351	4.907	0.553	4.51
750	1	54	7	1	0	0	1	0	1.07	1.01	3.04	5.6	1.529	3.718	0.202	4.09
751	1	52	14	1	0	0	1	0	1.6	1.13	2.36					3.75
752	0	51	11	1	0	0	1	0	1.66	1.07	3.86	9.6	3.254	5.568	0.672	5.04
753	1	70	7	1	0	0	1	0	1.67	1.27	3.79	6	2.07	3.21	0.516	5.22
754	0	66	13	1	0	0	1	0	2.74	1.01	3.79					5.25
755	0	65	13	1	0	1	0	1	1.69	1.22	3.19	13.1	2.017	10.585	0.485	4.58
756	0	87	19	1	0	0	1	0	1.17	1.36	3.29	9.4	1.081	7.849	0.348	4.72
757	1	83	10	1	1	0	1	0	3.7	1.1	1.69	5	1	3.565	0.315	3.94
758	0	57	4	1	0	0	1	0	1.75	1.07	3.66	7.5	1.575	5.34	0.413	4.85
759	0	52	9	1	0	0	1	0	1.52	0.91	2.16	8.2	1.755	6.052	0.344	3.37
760	0	48	9	1	1	0	1	0	10.32	0.66	1.75	8	1.872	5.456	0.504	5.8
761	1	48	8	0	0	0	1	0				16.6	2.341	13.496	0.614
762	1	81	18	0	0	0	1	0	1.15	1.78	4.04	3.7	1.217	2.076	0.278	5.71
763	0	69	22	1	1	0	0	1	0.72	0.87	2.68	8.5	1.411	6.103	0.748	3.71
764	0	35	13	1	0	0	1	0	1.72	1.1	4	9.8	2.254	6.517	0.804	5.43
765	0	56	10	1	0	0	1	0	0.63	1.61	2.76					4.25
766	0	56	21	1	0	0	1	1				17	1.122	15.334	0.51
767	0	48	6	1	0	0	1	0	1.65	1.34	5.25	12	2.724	8.256	0.696	6.66
768	0	68	15	1	0	0	1	0	0.86	1.28	2.73	3.6	1.141	1.966	0.364	3.88
769	1	84	12	1	0	0	1	0	1.71	0.73	2.41	6.2	1.5	3.993	0.589	3.52
770	1	80	17	1	0	0	1	0	1.33	0.76	3.04	13.6	1.278	5.916	0.571	4.06
771	1	55	10	1	1	0	1	0				8.4	1.798	6.006	0.496
772	0	59	7	0	1	0	1	0	12.18	0.89	3.63	7.5	2.085	4.845	0.413	9.06
773	0	70	29	0	0	0	1	0				6.9	1.601	4.085	0.386
774	0	48	8	1	0	0	1	0	2.29	0.9	3.39	10.7	1.99	8.004	0.567	4.8
775	1	86	9	1	0	0	1	0	0.89	1.37	1.5	6.4	1.722	3.974	0.435	2.86
776	1	46	21	1	0	0	1	1	3.6	1.38	3.44	12.3	1.685	10.135	0.344	5.41
777	0	67	7	1	1	0	1	0	0.99	2.01	5.62	6	1.584	3.966	0.396	7.38
778	0	67	5	1	0	0	1	0	1.26	1.21	4.25	11	0.638	9.999	0.352	5.58
779	0	85	9	0	0	0	1	0	1.03	0.88	2.84	6.6	2.435	3.478	0.541	3.78
780	0	75	10	1	0	0	1	1	0.65	1.71	2.13	23.4	1.521	19.867	1.966	3.78
781	1	80	10	1	1	0	1	0	0.94	1.31	2.59	8.7	1.931	6.064	0.505	3.86
782	0	81	10	1	0	0	1	1	1.4	1.52	4.66	5.9	0.797	3.9	0.466	6.4
783	0	57	8	1	0	0	1	0	7.85	1.09	2.28	5.1	1.709	2.774	0.434	5.66
784	1	85	9	1	1	0	1	0	2.22	0.95	4.22	6	0.954	4.728	0.246	5.63
785	0	55	14	1	0	0	0	0	0.96	1.11	4.59	6.4	2.208	3.61	0.32	5.85
786	0	66	28	1	0	0	0	0	0.81	1.41	2.98					4.4
787	1	60	9	1	0	0	1	0	2.97	0.8	4.14	7.2	3.06	3.456	0.446	5.62
788	0	52	27	1	0	0	0	0	0.73	1.26	3.31	15.5	2.527	12.106	0.698	4.67
789	0	65	5	1	0	0	1	0	1.04	1.18	3.37	6.4	1.587	4.333	0.352	4.5
790	0	66	6	1	1	0	1	0	1.4	0.97	2.6	10.2	1.397	8.415	0.306	3.94
791	0	71	10	1	0	0	1	0	1.13	1.46	3.31					5
792	0	75	10	1	1	0	1	0	0.92	1.3	1.71	7.7	1.879	5.113	0.454	3.24
793	1	70	11	1	0	0	1	0	0.85	1.47	4.44					6.04
794	0	53	30	1	0	1	1	1	0.92	1.57	2.14	14.9	1.162	12.561	0.954	3.87
795	0	47	7	1	0	0	1	0	1.46	0.86	3.1	10	3.34	5.81	0.56	4.35
796	0	53	16	0	1	0	0	0	2.45	1.74	3.19	5.9	1.54	3.953	0.342	5.57
797	0	56	17	1	0	0	1	0	2.83	1.06	4.5	4.6	1.38	2.788	0.313	6.29
798	1	64	9	1	1	0	1	0	1.4	1.14	3.93	6.6	1.637	4.462	0.33	5.32
799	0	48	15	1	1	0	1	0	1.28	1.39	3.3	8.4	1	7.09	0.294	4.97
800	0	67	14	1	0	0	1	0	1.74	0.67	2.78	5.6	2.01	3.063	0.437	3.94
801	0	80	8	1	1	0	1	0	1.34	1.02	1.91	9.9	1.525	7.712	0.515	3.33
802	0	61	9	1	1	0	1	0	0.61	1.63	3.69	7.9	2.228	5.206	0.387	5.38
803	0	49	5	1	0	0	1	0	0.97	1.25	3.09					4.5
804	1	67	21	1	1	0	1	0	1.43	1.46	4.03	6	1.164	4.272	0.366	5.79
805	0	50	8	1	0	0	1	0	1.27	1.52	3.26	6.7	1.802	4.422	0.429	4.89
806	0	46	7	1	0	0	1	0				9.3	1.934	6.715	0.428
807	0	83	14	1	0	1	1	0	0.99	1.19	2.93	4.8	0.931	3.317	0.403	4.33
808	0	58	5	1	1	0	1	0	1.69	1.07	3.53					5.06
809	0	72	16	1	1	0	1	0	1.61	1.07	2.38	9.5	1.767	6.774	0.58	4.12
810	0	60	8	1	1	0	1	0	2.12	0.93	3.59	11.4	2.257	8.39	0.547	5.4
811	0	68	10	1	0	0	1	0	0.67	1.4	1.29	3.9	1.073	2.301	0.355	2.79
812	0	55	6	1	1	0	0	0	12.46	1.21	3.46	6.4	1.261	4.646	0.435	9.79
813	0	60	6	1	0	0	1	0	1.66	0.84	3.63	9.7	1.183	8.061	0.446	4.81
814	0	44	6	1	0	0	1	1	2.37	0.79	3.53	9.6	1.536	7.498	0.538	4.87
815	0	68	27	1	0	0	0	0	0.99	1.35	2.08	7.3	1.387	5.599	0.307	3.47
816	0	70	6	1	0	0	0	0	1.22	1.14	3.61	7.9	2.228	5.064	0.466	4.82
817	0	71	9	1	1	0	1	0	0.47	0.96	0.87	12.7	0.533	11.214	0.94	1.93
818	0	58	7	1	1	0	1	0	1.58	1.15	2.24					3.73
819	0	56	10	1	1	0	1	1	1.84	1.45	6	6.9	0.614	5.941	0.297	7.65
820	0	47	6	1	0	0	1	0	2.42	0.97	3.13	5.3	1.065	3.54	0.313	4.38
821	0	54	10	1	1	0	0	0	1.76	0.92	2.18	6.7	1.91	4.167	0.355	3.38
822	0	45	4	1	0	0	1	0	1.85	1.52	4.09	6.9	2.85	3.05	0.738	5.67
823	1	74	14	1	1	0	1	0	1.46	1.25	3.26	7.8	1.162	6.341	0.242	4.72
824	0	74	7	1	0	0	1	0	0.68	1.24	2.9	7.5	1.155	5.723	0.57	4.13
825	1	69	6	1	0	0	1	0	2.31	0.92	4.53	7.6	2.675	4.188	0.524	5.93
826	0	64	10	1	1	0	0	0	1.71	0.7	1.53	5.5	1.793	2.657	0.506	2.74
827	0	84	9	1	0	0	1	0	0.55	1.69	1.78	11.8	0.413	10.998	0.366	3.27
828	0	52	4	1	0	0	0	0	0.75	1.38	2.22	9.1	0.901	7.653	0.528	3.71
829	1	57	12	1	0	0	1	0	1.06	1.33	3.11	9	0.9	7.605	0.45	4.81
830	0	62	26	1	0	0	1	1	1.88	1.02	3.49	16.1	1.771	11.318	2.544	5
831	1	49	18	1	0	0	1	0	1.42	0.86	1.85					2.85
832	1	81	24	1	0	1	1	1	0.69	1.54	3.56	5.2	1.269	3.453	0.348	5.01
833	1	71	13	1	0	0	0	0	1.47	1.1	4.54	10.3	1.751	7.941	0.546	5.83
834	0	59	13	1	1	0	1	0	1.89	0.92	2.45	13.6	0.802	12.131	0.598	3.75
835	1	60	21	1	0	0	1	0	1.42	1.28	2.05	6.7	1.628	4.77	0.241	3.7
836	0	52	5	1	1	0	0	0	2.87	0.79	3.24	6.3	1.285	4.555	0.328	4.88
837	0	90	8	1	0	0	1	0	0.9	0.52	1.97	4.7	1.551	2.656	0.334	2.76
838	0	50	5	1	0	0	1	0	2.57	0.84	3.23	10.1	3.656	5.595	0.626	4.93
839	0	61	9	1	0	0	1	0	1.88	0.85	3.11					4.66
840	0	46	7	1	1	0	1	0	1.7	0.86	4.13	11.5	2.266	8.476	0.702	5.52
841	1	71	8	1	1	1	1	0	1.26	1.36	3.82	9.2	1.26	7.434	0.432	5.55
842	0	64	5	1	0	1	0	0	0.84	1.04	3.52					4.74
843	0	68	8	1	1	0	1	0	3.65	1.05	3.98	6.4	1.254	4.646	0.442	5.89
844	1	68	9	1	0	0	1	0	0.97	1.44	2.21	6.7	2.358	3.98	0.261	3.78
845	1	66	9	1	0	0	0	0	1.45	1.92	4.77	9	0.783	7.794	0.36	7.07
846	1	76	16	1	0	0	1	0	1.27	0.99	4.26	6.8	1.918	4.175	0.381	5.6
847	0	63	16	1	0	0	1	0	0.76	1	2.54	21.7	1.215	18.944	1.497	3.74
848	0	59	8	1	0	0	1	0	2.01	0.98	4.44	6.5	1.443	4.316	0.462	5.93
849	0	71	6	1	0	0	1	0	1.13	1.18	2.35	5.4	1.539	3.526	0.292	3.75
850	0	74	7	0	0	0	1	0	1.56	1.03	3.08	7.4	1.946	4.795	0.503	4.54
851	0	84	4	1	0	0	1	0	1.46	0.9	2.76	6.6	0.647	5.056	0.614	4.32
852	1	65	7	1	1	0	1	1	1.85	1.59	2.98	15	2.13	12.255	0.48	4.96
853	0	67	6	1	0	0	0	0	1.35	1.1	4.22	6.1	1.379	3.782	0.281	5.69
854	0	46	16	1	0	0	1	0	1.8	1.21	5.12					6.75
855	0	73	5	1	1	0	1	0	3.65	0.77	2.03	6.2	2.536	3.131	0.335	4.37
856	1	77	8	1	1	0	1	0	1.27	1.32	4.21	6.3	0.743	5.135	0.353	5.9
857	1	81	12	1	0	1	1	0	0.44	1.33	1.66					2.94
858	0	41	23	1	0	0	0	0	0.72	1.08	3.33					4.63
859	0	83	17	1	1	0	1	0				5.2	1.404	3.224	0.369
860	1	62	8	1	1	0	1	0	2.77	1.17	4.74	7	2.569	3.822	0.378	6.97
861	1	65	11	1	0	0	0	0	1.41	1.1	5					6.69
862	0	47	5	1	0	0	0	0	1.94	0.8	3.51	7.5	2.378	4.523	0.458	5
863	0	90	7	1	0	1	1	1	2.45	0.82	2.7	10.4	2.382	7.03	0.894	4.49
864	0	42	13	1	1	0	1	0				11.9	0.559	10.96	0.345
865	0	56	10	1	0	0	1	0	1.16	1.32	3.32	4.1	1.041	2.591	0.279	4.86
866	0	63	7	1	0	0	1	0	1.68	1.37	3.99	8.9	1.86	6.524	0.409	5.7
867	0	45	17	1	0	0	1	0	4.33	0.97	4.19					6.78
868	0	70	7	1	0	0	1	0	1.41	1.04	2.97	16.2	1.215	13.883	0.956	4.22
869	0	62	7	1	0	0	1	0	1.17	1.72	3.51	6.7	1.273	5.005	0.288	5.58
870	0	34	1	1	0	0	1	1	1.47	0.96	4.5	14.2	0.895	13.078	0.213	5.97
871	0	64	7	1	0	0	1	0	3.21	1.05	4.34	4.4	0.884	3.045	0.29	6.17
872	0	49	9	1	0	0	1	0	1.23	0.97	2.7	7.5	1.83	5.213	0.413	4.02
873	0	58	6	1	0	1	1	0	0.72	1.34	3.5	6.2	1.649	4.011	0.434	4.99
874	0	63	15	1	0	0	1	0	1.14	1.02	3.15	11	0.627	10.021	0.33	4.56
875	0	50	4	1	0	0	0	0	1.62	1.01	2.56	8.1	2.292	5.152	0.381	3.99
876	0	50	13	1	0	0	1	0	1	1.2	3.1	7.6	1.064	6.194	0.258	4.7
877	1	72	5	1	0	1	1	0	1.06	1.75	5.58					6.58
878	0	39	7	1	1	0	0	0
879	0	68	13	1	0	0	1	0				5.3	1.224	3.042	0.466
880	0	79	6	1	0	0	1	0	0.7	1.56	1.86	6	0.996	3.504	0.594	3.62
881	0	76	9	1	1	1	1	1	2.32	0.76	3.48	10	0.81	7.91	1.24	5.29
882	0	45	5	1	0	0	1	0	0.83	1.31	3.55	5.8	1.114	4.333	0.296	5.09
883	0	31	8	1	0	0	1	0				11.5	1.978	8.993	0.483
884	1	54	7	1	0	0	1	0	1.31	1.28	4.09	7.4	1.384	5.58	0.377	5.68
885	1	86	13	1	0	0	0	0	1.09	1.05	2.93	10.8	1.922	8.046	0.756	4.23
886	0	56	11	0	1	0	1	0				6	2.136	3.474	0.228
887	0	53	8	1	1	0	1	0	2.29	1.14	4.28	11.6	1.798	8.897	0.545	6.11
888	1	64	9	1	0	0	1	0	2.62	1.12	2.42	7	1.512	5.089	0.371	4.38
889	0	86	5	0	0	1	0	0	0.61	2.1	2.45	3.9	0.679	2.652	0.281	4.61
890	1	75	11	1	0	0	1	0	1.08	1.13	2.53	5.2	0.78	3.994	0.317	3.91
891	1	46	11	1	0	0	1	0	2.69	0.82	2.49	8.3	2.274	5.478	0.506	3.95
892	1	42	9	1	0	0	1	0	1.24	0.95	1.99	10.1	2.454	7.121	0.465	3.32
893	1	71	6	1	0	1	1	1	1.11	1.47	3.72	5.9	1.564	3.823	0.372	5.42
894	0	57	4	1	0	0	1	0	4.21	0.71	2.86	7.2	2.059	4.406	0.583	4.95
895	1	51	4	1	0	0	1	0	1.24	1.01	2.71	7.4	1.658	5.395	0.303	4.08
896	0	50	3	1	0	0	1	0	1.81	0.71	8.16	13.5	7.763	4.59	0.945	9.8
897	1	60	19	1	1	0	1	0	1.07	1.32	3.87	14.4	0.749	13.291	0.302	5.4
898	0	51	28	1	0	0	1	1	1.14	0.34	2.38	16.8	0.974	15.137	0.588	3.1
899	1	78	10	0	1	0	1	0	1.69	0.89	2.58	5.9	1.298	4.142	0.36	3.74
900	0	64	17	1	1	0	1	0	2.2	0.76	2.77	9	1.197	6.903	0.495	4.29
901	0	71	6	1	0	1	1	0	0.84	1.06	2.88					4.18
902	1	80	13	1	1	0	1	0	1.13	1.43	4.41	8.5	2.049	5.967	0.34	6.25
903	0	66	15	0	0	0	1	0	1.54	1.4	2.97	4.4	1.465	2.644	0.22	4.78
904	0	52	10	1	0	0	1	0	1.09	0.83	2.78	6.8	0.734	5.624	0.231	3.96
905	1	47	5	1	0	0	1	0	1.31	1.17	2.53	5.9	1.109	4.514	0.189	4.36
906	0	69	11	1	0	0	1	1	0.85	0.88	2.31	7.1	0.93	5.723	0.383	3.64
907	1	77	10	1	0	0	1	0	1.08	1.05	2.93	11.9	1.214	10.21	0.452	4.56
908	0	60	12	1	0	0	1	0	1.62	0.8	3.49					4.72
909	0	47	12	1	1	0	1	0	1.46	1.04	2.91	9.5	1.406	7.543	0.447	4.24
910	0	36	5	1	0	0	1	0	1.5	0.99	4.61					6.12
911	0	83	6	0	0	0	1	0	0.9	1.14	2.68	7.2	1.901	4.759	0.353	3.42
912	1	74	17	0	1	0	1	0	2.09	1.01	2.14	9.1	2.23	6.088	0.592	3.86
913	0	82	7	1	0	1	1	0	0.93	1.05	2.45	3.9	1.326	1.751	0.753	3.69
914	1	66	24	1	1	0	1	0	1.39	0.86	1.59	6	1.422	3.786	0.468	3.02
915	1	49	9	1	0	0	1	0	1.65	0.66	0.66	8.1	1.077	6.391	0.397	1.77
916	0	62	18	0	0	0	1	0	0.9	0.67	3.11	6.6	1.016	4.679	0.601	4.14
917	0	50	18	1	1	0	1	0	2.58	0.82	4.13	7.8	1.732	5.639	0.328	5.49
918	0	91	9	1	0	0	1	0	0.69	1.21	2.27	6.2	1.953	3.125	0.887	3.57
919	0	69	9	1	0	0	1	1	1.86	0.96	3.99	10.9	1.493	8.23	0.73	5.56
920	0	56	6	1	1	0	1	0	2.89	0.69	3.18	8	3.016	4.344	0.416	4.47
921	0	73	4	1	0	0	1	0	0.78	1.21	3.02	7.6	1.383	5.92	0.243	4.33
922	0	65	5	1	0	0	1	0	1.72	0.95	2.62	20.1	2.995	16	0.643	4.01
923	0	54	8	1	1	0	1	0	0.96	1.08	2.7	7.9	1.683	5.103	0.656	3.97
924	0	71	4	1	0	0	0	0	1.34	1.32	3.05					4.71
925	0	62	8	1	0	0	1	0	1.84	0.91	3.1	7.4	1.243	5.698	0.407	4.35
926	1	52	5	1	0	0	1	0	1.13	1.32	2.91	4.8	1.517	2.654	0.408	4.48
927	1	72	9	1	1	0	1	0	2.14	1.03	2.92					4.53
928	0	68	6	1	1	0	1	0				5.3	1.627	3.169	0.371
929	0	86	11	1	0	1	1	1	0.77	0.82	2.82	4.7	1.26	2.975	0.418	3.49
930	0	58	4	1	0	0	1	0	1.8	0.59	2.74	7.9	1.849	5.467	0.458	3.95
931	0	65	13	1	0	0	0	0	0.86	1.12	2.5	10.4	2.246	7.249	0.853	3.66
932	0	53	6	1	0	0	1	0	2.76	0.76	2.16	7.4	2.109	4.396	0.607	3.55
933	0	65	12	0	1	0	1	0	2.17	0.74	3.31	10.3	2.462	6.376	0.659	4.82
934	0	80	6	1	1	0	1	0	0.85	0.77	1.63	4.4	0.889	3.128	0.352	2.66
935	0	49	6	1	0	0	1	0	1.61	1.01	3.93					5.29
936	0	55	6	1	0	0	1	0
937	0	54	6	1	0	0	1	0	0.8	0.95	2.96	10.4	3.151	5.938	0.749	3.97
938	0	58	6	1	1	0	1	0	1.2	0.9	2.3	10.9	1.384	8.938	0.316	3.56
939	0	54	9	1	0	1	1	0	0.53	1.63	2.13					3.83
940	0	74	3	1	0	0	1	0	1.18	0.9	1.62	18.1	0.706	15.222	0.796	2.76
941	0	80	7	1	0	0	1	1	0.96	1.95	2.36	7.4	1.539	5.439	0.392	4.56
942	0	58	6	1	1	0	0	0	4.67	0.75	3.62					6.01
943	1	85	5	1	1	0	1	0	1.17	1.04	3.89					5.27
944	0	51	2	1	0	0	1	0	1.51	0.88	4.46	8.6	0.645	7.671	0.232	5.72
945	0	72	7	1	1	0	1	0	1.44	1.55	2.81	6.4	2.291	3.174	0.614	4.79
946	1	76	9	1	0	0	1	0	0.61	1.38	3.1	7.9	0.83	6.834	0.237	4.77
947	1	67	23	1	1	0	1	0	0.96	1.45	2.95	8.3	1.129	6.217	0.498	4.83
948	0	68	5	1	0	0	1	0	1.22	1.6	3.14	15.2	0.912	13.726	0.517	5.19
949	0	58	11	1	0	0	1	0	0.95	0.8	4.06	9	3.186	4.896	0.657	5.34
950	0	56	5	1	0	0	1	0	1.54	0.83	4.76	6.8	2.013	4.162	0.49	6.28
951	0	70	8	0	1	0	0	0	1.06	0.86	1.72	27.7	0.526	26.038	1.08	3.2
952	0	56	12	0	1	0	1	0	1.51	0.55	2.19	4.9	1.73	2.607	0.372	3.19
953	0	71	8	1	0	0	1	0	1.41	1.71	3.84	10.3	1.875	7.704	0.608	6.04
954	1	86	18	1	0	0	1	1	1.67	1.56	2	5.3	0.562	4.351	0.345	4.23
955	1	75	14	0	0	0	1	0	1.04	2.12	3.62	8	1.52	6.056	0.344	6.06
956	0	74	8	1	0	0	1	0	1.07	1.2	5.12	6.2	0.893	4.879	0.26	6.44
957	1	81	12	1	0	0	1	0	1.03	1.07	3.29	6.5	1.671	4.115	0.527	4.71
958	1	74	8	1	0	0	1	0	1.12	1.3	3.71	6.1	0.488	5.344	0.22	5.33
959	0	59	10	1	0	0	1	1	0.56	1.01	2.12	10	0.83	8.38	0.69	3.35
960	0	57	4	1	0	0	1	0	1.15	0.84	3.47	11.9	2.678	8.187	0.678	4.66
961	1	52	5	1	0	0	1	0	0.84	1.61	2.37	6.9	1.649	4.809	0.414	4.11
962	0	101	7	1	0	0	1	1	0.44	1.98	1.28	6.5	0.202	5.922	0.351	3.44
963	0	81	12	0	1	0	0	0	1.36	0.91	3.73	6.5	2.047	3.965	0.299	5.06
964	0	77	7	1	0	1	0	0	0.98	0.97	3.77					5.12
965	0	79	6	1	0	0	1	0	0.63	1.51	2.03					3.65
966	0	77	9	1	0	0	1	0	0.66	1.02	2.89	8.4	1.134	6.938	0.277	4.09
967	1	64	4	0	1	0	0	0				4.1	1.956	1.677	0.258
968	0	62	6	1	1	0	1	0	1.85	0.88	2.79					4.15
969	0	33	8	1	0	0	0	0	1.45	0.68	2.49					3.69
970	1	75	13	1	1	0	1	0	1.97	1.29	3.26	6.7	1.273	4.871	0.342	4.97
971	1	75	6	1	0	0	1	0	0.82	1.23	3.44	8.9	1.121	7.058	0.472	4.96
972	1	59	2	1	0	0	0	0	0.82	0.91	2.12	13.8	0.428	12.986	0.373	3.09
973	0	71	15	0	1	0	1	0	1.33	1.4	3.8	6.8	1.251	4.746	0.483	5.57
974	0	54	7	1	0	0	1	0	1.66	1.27	4.55					6.27
975	1	78	23	1	1	0	1	0	2.55	0.81	3.77	9.3	2.483	5.999	0.707	5.22
976	0	72	7	1	0	0	1	0	1.77	1.1	0.86	6.7	1.735	3.846	0.509	2.31
977	0	46	23	1	0	0	1	0	0.92	0.92	3.18	11.5	2.956	7.418	0.736	4.26
978	1	72	19	1	1	0	1	0	1.6	1.3	5.79	6.4	1.53	4.211	0.442	6.75
979	0	73	7	1	0	0	1	0	1.42	1.01	4.39	6	1.35	4.272	0.318	5.16
980	0	82	7	0	0	0	1	0	1.09	0.77	3.32	6.3	0.939	4.927	0.29	4.43
981	1	81	14	1	0	0	1	0	1.04	1.12	4.76	9.2	1.334	7.535	0.258	6.05
982	1	56	30	1	0	0	1	0	1.59	0.97	3.65	9.9	2.228	6.9	0.515	4.75
983	1	81	6	1	1	0	1	0	1.44	1.21	3.55	8.3	1.984	5.735	0.473	5.13
984	1	65	15	1	0	0	0	0	2.52	1	2.17	8.8	2.121	5.817	0.792	3.67
985	0	72	7	1	1	0	1	0	1.3	1.24	4.35	8.2	2.025	5.609	0.443	5.77
986	0	40	14	1	0	0	1	0	1.45	0.87	4.28	10.4	2.465	6.958	0.697	5.64
987	0	72	9	1	1	0	1	0	5.03	1.04	2.79	7.4	1.554	4.973	0.533	5.16
988	0	76	11	1	1	1	1	1	2.25	1.3	2.63	10.9	0.73	9.603	0.534	4.44
989	0	66	7	1	0	0	1	0	0.39	1.45	1.64					3.15
990	0	54	7	1	1	0	0	0	2.01	0.95	2.81	4.3	1.81	2.025	0.232	4.48
991	0	68	8	0	0	0	1	0	1.66	0.82	3.38	4.3	0.83	2.593	0.847	4.75
992	0	36	10	0	0	0	1	0	1.08	1.57	3.41	7.6	0.57	6.718	0.258	5.06
993	0	73	9	0	0	0	1	0	0.92	1.42	3.93	7	1.596	4.886	0.406	5.48
994	0	48	9	1	0	0	0	0	1.06	1.22	3.49					5.06
995	1	46	8	1	1	0	1	0	1.64	1.1	2.56	12.9	1.458	10.823	0.555	4.1
996	0	54	16	1	0	0	1	0	1.19	1.22	2.61	6.3	1.72	4.057	0.391	4.07
997	0	52	9	1	0	0	1	0	2.42	0.92	4.77	5.8	1.781	3.608	0.302	5.82
998	0	44	10	1	0	0	1	0	1.74	1.3	4.04					5.63
999	0	66	6	0	0	0	1	0	1.42	0.97	2.08	9.6	2.986	5.203	0.893	3.25
1000	1	50	5	1	0	0	1	0	1.71	0.99	2.93					4.39
1001	0	34	5	1	0	0	1	0	1.8	0.81	3.64	13.7	0.877	12.385	0.397	4.79
1002	0	68	9	1	1	0	1	0	2.5	0.94	3.42	6.6	1.815	3.927	0.508	4.97
1003	0	64	13	1	1	0	0	0	1.05	1.2	4.27					5.61
1004	0	56	10	1	0	0	0	0	0.88	1	4.65					5.8
1005	0	42	21	1	0	0	1	0	1.91	0.82	2.72	10.3	1.411	8.405	0.402	3.77
1006	1	88	11	1	0	1	1	0	0.62	1.62	2.3	5	1.24	3.4	0.32	4.19
1007	0	60	13	1	1	0	1	0	1.13	1.18	3.37	5.5	1.942	3.08	0.341	4.47
1008	1	78	7	1	0	0	1	0	1.85	1.37	4.29	8.5	1.037	7.038	0.332	5.94
1009	0	53	5	0	0	0	1	0	1.48	1.05	2.35	7.5	2.46	4.53	0.368	3.71
1010	0	48	11	1	1	0	1	0	8.6	0.79	2.75	17.8	1.388	15.717	0.605	6.6
1011	1	62	11	0	0	0	1	0	1.11	2.27	6.25	11	3.003	7.139	0.748	8.18
1012	0	69	15	0	1	0	0	0				9	1.26	6.678	0.594
1013	1	48	5	1	0	0	1	0	1.62	1.11	3.13	8.6	2.021	5.968	0.516	4.73
1014	1	57	14	1	1	0	1	0	1.36	1.19	2.77	9.1	1.947	6.434	0.428	4.24
1015	0	71	7	1	0	0	1	0	2.54	1.01	4.65					6.36
1016	1	61	10	1	1	0	1	0	2.22	1.21	3.73	8.9	2.519	5.794	0.409	5.32
1017	0	57	7	1	0	0	1	0	1.22	1.1	5					5.63
1018	0	75	22	1	1	0	1	0	2.05	0.68	0.77	8.7	1.644	5.394	1.583	1.99
1019	1	73	6	1	1	0	1	0	0.92	1.23	2.81	9.7	1.552	7.527	0.495	4.08
1020	0	79	10	1	0	0	1	0	0.52	0.98	1.13	4.6	0.851	3.45	0.281	2.21
1021	1	73	14	1	0	0	1	0	1.08	2.27	3.79	18.9	1.777	15.763	0.964	5.99
1022	0	73	7	1	0	1	1	1	0.85	1.27	2.92					4.25
1023	1	66	24	1	1	0	1	1	1.43	1.07	4.53	8.3	0.681	7.304	0.249	5.74
1024	1	72	9	1	0	0	1	0	1.19	1.42	5.51	7.9	2.22	5.206	0.363	6.99
1025	0	77	10	1	0	0	1	0	1.04	0.89	4.13					5.38
1026	0	50	7	1	0	0	1	0	0.64	1.64	3.15					4.98
1027	0	66	29	1	1	0	1	0	0.67	2.01	2.72	5.4	1.458	3.159	0.351	4.8
1028	0	58	12	1	0	0	1	0	1.34	1.18	4.08	9.3	1.525	6.984	0.688	5.44
1029	1	79	7	1	1	0	1	0	1.59	1.41	2.84	8.3	2.183	5.694	0.407	4.71
1030	0	34	28	1	0	0	0	0	4.85	1.16	4.4	18.1	0.724	17.05	0.308	6.85
1031	0	56	6	1	0	0	1	0	1.14	1	2.59	8.2	1.952	5.478	0.451	3.98
1032	0	59	8	0	0	0	1	0	1.36	1.17	3.47	4.1	1.013	2.46	0.418	4.98
1033	0	42	7	1	0	0	0	0	2.24	0.6	3.74	9	2.358	6.138	0.351	4.99
1034	0	54	7	0	0	0	0	0	1.19	1.01	3.79	6.4	1.421	4.685	0.25	5.22
1035	0	65	15	1	1	0	1	0	1.52	0.66	2.47	9.7	1.63	6.15	0.825	3.63
1036	0	69	11	1	0	1	1	0	1.06	1.21	2.72	14.2	2.357	11.033	0.568	4.13
1037	0	64	19	1	0	0	1	0	1.02	1.29	2.61	6.1	0.921	4.514	0.525	3.95
1038	0	55	9	1	0	0	0	0	1.56	1.02	3.81	8.3	1.702	6.15	0.415	5.32
1039	1	79	30	1	1	0	1	0	2.62	0.94	3.63	24.5	0.27	23.373	0.833	5.54
1040	0	55	4	1	0	0	1	0	1.64	1.35	3.04	5.3	1.012	3.588	0.456	4.83
1041	1	28	3	1	0	0	0	0	0.41	1.53	3.96	10.6	1.198	9.052	0.318	5.45
1042	0	52	11	1	0	0	1	0	1.25	1.3	2.83	10.1	1.364	8.312	0.364	4.52
1043	1	54	8	1	0	0	1	0				4	1.624	1.98	0.336
1044	0	48	9	1	0	0	0	0	1.35	0.89	2.92					4.3
1045	1	52	9	1	1	0	1	0	9.04	0.74	2.39	4.7	1.067	3.107	0.31	6.48
1046	1	79	26	1	1	0	1	0	1.1	1.23	2.99	6	1.488	4.176	0.264	4.87
1047	0	60	6	1	0	0	0	0	1.5	0.86	3.71					5.03
1048	0	43	6	1	0	0	1	0	1.38	1.2	2.52	9.1	1.975	6.661	0.419	4.22
1049	1	85	7	1	1	0	1	0	1.2	1.1	2.73	10.2	0.724	8.966	0.428	4.39
1050	0	49	8	1	1	0	1	1	4.39	0.76	3.34	14.8	1.909	11.855	0.992	5.27
1051	1	55	3	1	0	0	1	0	1.11	1.29	3.25	5	1.275	3.355	0.27	4.96
1052	0	53	4	1	0	0	0	0	1.97	0.89	3.72					5.11
1053	0	75	5	1	0	0	1	0	1.39	1.08	1.5					2.98
1054	1	62	4	1	1	0	1	0	0.62	1.85	3.9	9.4	1.25	7.52	0.404	5.6
1055	0	77	9	1	0	1	0	0	1.12	1.02	3.21	17.3	1.228	15.172	0.848	4.52
1056	1	80	7	1	1	0	1	0	1.92	0.93	2.3	8	1.424	6.312	0.232	3.74
1057	0	42	5	1	0	0	1	0	1.56	1.23	4.1	7.4	1.798	4.906	0.37	5.63
1058	0	51	6	0	0	0	1	0	0.92	0.67	3.06	8.3	1.685	5.843	0.672	4.2
1059	1	85	3	1	0	0	1	0	0.85	1.04	3.57	8.6	2.365	5.573	0.585	4.8
1060	0	63	4	1	0	0	1	0	0.93	1.92	2.97	4.5	1.112	2.984	0.387	5.01
1061	1	84	7	1	0	0	1	0	2.07	0.91	3	9.1	1.301	7.353	0.364	4.64
1062	0	49	14	1	0	0	1	0	0.92	1.14	1.54	6.5	1.612	4.199	0.514	2.92
1063	0	53	19	1	0	0	1	0	1.58	1.03	3.32					4.83
1064	0	58	5	1	0	0	1	0	2.64	1.03	2.76	7.8	2.114	5.023	0.468	4.63
1065	0	73	6	1	0	0	1	0	1.95	1.17	4.19	4.3	2.133	1.694	0.314	5.72
1066	0	39	5	1	0	0	0	0				7.4	1.931	4.566	0.636
1067	0	73	8	1	0	1	1	0	2.9	0.89	2.83					4.63
1068	0	39	8	0	0	0	0	0	1.47	0.88	3.16					4.5
1069	0	48	4	0	0	0	1	0	2.43	1.22	3	8.4	2.31	5.485	0.47	4.84
1070	0	45	8	0	1	0	0	0				8.1	1.814	5.322	0.567
1071	0	55	13	1	0	0	0	0	1.85	1	3.71	13.9	1.515	11.718	0.639	5.07
1072	0	69	11	0	1	0	1	0	1.78	1.11	4.71	10.1	2.525	6.616	0.768	6.31
1073	1	67	7	1	0	0	0	0	1.17	1.51	2.99	6.6	1.406	4.699	0.317	4.27
1074	1	76	11	1	0	0	1	1
1075	0	85	10	1	0	1	0	1	0.98	1.23	2.92	8.1	0.851	6.812	0.429	4.34
1076	0	40	30	1	0	0	0	0	1.02	0.83	2.06	13.3	0.971	11.997	0.306	3.13
1077	0	54	3	1	1	0	0	0	1.07	1.53	2.88	10.3	1.957	7.395	0.567	4.49
1078	1	59	7	0	1	0	1	0	3.6	1.04	7.62	9.7	1.707	7.217	0.582	10.07
1079	0	45	7	1	0	0	0	0	1.39	0.74	3.95					5.19
1080	0	51	8	1	0	0	1	0	1.13	1.01	3.61	7.5	2.228	4.605	0.428	4.93
1081	0	51	9	1	1	0	1	0	1.35	0.81	1.65					2.83
1082	0	51	15	1	0	0	1	0				8.1	2.73	4.625	0.502
1083	0	57	13	1	0	0	1	0	1.02	1.3	3.87	7.1	2.229	4.196	0.483	5.34
1084	0	83	5	1	0	1	1	0	0.63	0.97	1.58	3.8	0.57	2.888	0.27	2.62
1085	0	51	8	1	0	0	1	0	2.12	1.07	3.88	8.1	2.057	5.289	0.64	5.57
1086	1	47	11	1	0	0	1	0	1.04	1.73	4.08	9.3	0.856	8.026	0.381	6.11
1087	0	64	6	1	0	1	0	0	0.7	1.55	3.44	13.2	0.647	12.302	0.224	4.98
1088	1	66	8	1	1	0	1	0	1.19	1.12	2.42	7.2	0.461	6.386	0.317	3.82
1089	0	55	7	1	1	0	1	0	1.89	0.92	2.29	6	2.058	3.684	0.198	3.66
1090	1	58	6	0	1	0	1	0	2.64	1.06	3.24	6.3	2.066	3.686	0.416	5.09
1091	0	71	30	1	1	1	1	0	1.55	0.85	2.91	9.3	1.209	7.217	0.623	4.13
1092	0	51	13	1	1	0	1	0	3.35	0.85	3.09	6.7	1.4	4.965	0.241	5.02
1093	0	42	13	1	0	0	1	0				11.5	2.082	8.648	0.656
1094	0	76	7	1	1	0	0	0	1.75	0.87	3.28	9.5	1.995	6.726	0.447	4.69
1095	1	75	17	0	1	0	1	0	4.25	0.78	5.14	10.1	2.778	6.737	0.475	7.75
1096	0	58	8	1	1	0	1	0	1.77	0.96	3.95					5.45
1097	1	68	9	0	0	0	1	0	1.38	1.08	3.12	6.3	1.184	4.838	0.208	4.62
1098	1	60	8	0	0	0	1	0	0.86	1.58	3.42	6	1.368	4.2	0.276	5.27
1099	0	57	14	1	0	0	1	0	1.4	1.09	2.13	12.8	0.947	11.469	0.358	3.67
1100	1	74	19	1	1	0	1	1	1.15	1.48	3.5	9.7	1.659	7.644	0.34	5.24
1101	0	59	9	1	0	0	1	0	1.54	1.53	4.44					6.32
1102	0	71	5	1	1	0	1	0	2.37	0.9	1.97	6.4	1.882	3.981	0.378	3.71
1103	0	65	6	1	0	0	1	0	2.02	1.29	4.8	6.5	1.924	4.089	0.403	6.42
1104	0	57	6	1	0	0	1	0				7.7	1.817	5.09	0.462
1105	1	60	6	1	1	0	1	0	2.13	0.75	2.7	8.8	2.816	5.333	0.475	4.06
1106	0	54	14	1	0	0	1	0	1	1.14	3.17	6.9	2.346	3.954	0.345	4.47
1107	1	49	6	1	0	0	1	0	1.82	1.12	3.2					4.52
1108	1	51	6	0	0	0	1	0	0.64	1.86	3.54	5.8	1.177	4.141	0.412	5.15
1109	0	58	15	1	0	0	1	0	1.63	1.08	1.88					3.39
1110	1	74	15	0	1	1	1	0	1.09	0.61	0.81	16.2	1.28	13.608	1.166	1.86
1111	0	48	10	1	0	0	1	0	5.55	1.46	4.15	14.4	2.218	11.174	0.936	6.8
1112	0	43	7	1	0	0	1	0	1.45	0.72	2.76	6.4	1.965	3.712	0.429	3.73
1113	0	64	20	1	0	0	1	1	0.97	1.27	2.13	6	0.456	5.226	0.18	3.64
1114	0	78	7	1	0	1	1	0	0.98	1.24	3.22					4.45
1115	0	55	6	1	1	0	1	0				5	2.365	2.295	0.23
1116	1	58	26	1	0	0	0	0	1.2	1.42	2.99					4.47
1117	1	63	5	1	0	0	0	0	1.97	0.99	3.96	7.1	1.306	5.297	0.405	5.55
1118	1	64	21	1	0	0	1	0	1.57	1.42	1.86	8	0.704	7.048	0.224	3.49
1119	1	66	15	1	1	0	1	0	1.09	1.49	3.43	6.7	1.072	5.166	0.261	4.85
1120	0	66	9	1	0	0	1	0	0.98	1.12	2.86					4.21
1121	0	53	8	1	0	0	1	0	1.43	1.39	3.35	7.3	1.11	5.701	0.402	4.87
1122	0	53	5	1	1	0	1	0	2.33	0.92	3.65					5.02
1123	0	34	8	0	0	0	0	0	1.81	0.85	2.27	6.9	1.773	4.485	0.483	3.43
1124	0	58	6	1	0	0	1	0	0.93	1.06	3.72					4.95
1125	1	44	7	1	1	0	1	0	2.65	0.98	2.79	3.3	0.723	2.211	0.208	4.17
1126	1	62	11	0	1	0	1	0	7.98	0.77	2.07	6.7	2.191	4.067	0.362	5.77
1127	0	75	8	1	0	0	1	0	0.7	1.33	2.04					3.39
1128	0	41	19	1	1	0	1	0	7.55	0.91	2.22					4.6
1129	0	69	7	1	0	0	1	0	1.53	0.98	4.81					5.95
1130	1	71	13	1	0	0	1	0	1.28	1.4	5					6.42
1131	0	58	6	1	0	0	0	0	2.66	0.93	3.39	9.6	1.354	7.67	0.499	4.75
1132	1	57	9	1	1	0	1	0	1.39	0.97	3.45	8.1	1.296	6.132	0.446	4.81
1133	0	64	7	1	0	0	1	0	1.8	0.74	4.06	8.2	1.443	6.093	0.5	5.18
1134	0	66	7	0	0	0	1	0	1.64	0.65	2.26	2.9	0.412	2.146	0.293	3.49
1135	1	82	25	1	1	0	1	0	1.98	1.04	4.4	7.1	1.385	5.105	0.391	5.95
1136	0	59	9	0	1	0	1	0	2.71	1.02	4.99	5.6	1.26	3.937	0.353	6.69
1137	1	70	24	1	1	1	1	0	0.52	1.99	2.18	9.2	0.561	8.032	0.598	4.07
1138	0	58	9	1	0	0	1	0	0.79	1.88	3.03	5.9	1.404	3.634	0.543	4.78
1139	0	54	4	1	0	0	1	0	2.25	1.02	4.75	9	1.566	7.047	0.36	6.43
1140	0	78	5	1	0	1	1	0	0.72	1.54	2.78	6.8	1.952	4.216	0.476	4.3
1141	0	59	9	1	0	0	0	0
1142	0	66	15	1	1	1	0	0	1.34	1	2.5	6.7	1.575	4.616	0.456	3.79
1143	1	59	6	1	0	1	0	0	1.08	1.95	4.41	7.2	1.526	5.011	0.54	6.19
1144	0	72	23	0	1	0	1	1	0.85	1.48	3.76	10.4	2.922	6.417	0.437	5.38
1145	0	72	14	1	1	0	1	0	4.94	0.87	2.23					4.52
1146	0	70	6	1	0	0	0	0	1.48	1.08	5.09	4.9	1.686	2.661	0.421	6.35
1147	0	63	14	0	0	0	1	0
1148	0	47	7	1	1	0	0	0	3.89	0.82	4.99	7.4	3.078	3.781	0.326	6.21
1149	0	58	7	1	1	0	1	0	1.89	0.95	2.25	9.5	1.321	7.135	0.608	3.98
1150	1	59	5	1	0	0	1	0	1.26	1.27	3.13	6.4	2.227	3.61	0.371	4.55
1151	0	75	10	1	0	0	1	0				5.6	1.131	3.763	0.358
1152	1	70	7	1	0	0	1	0	2.37	0.92	5.29	9.9	1.584	7.633	0.455	6.83
1153	1	49	17	1	1	0	1	0	1.63	0.69	1.54					2.62
1154	1	23	11	1	0	0	0	0	0.95	1.22	2.65	6.8	1.292	5.1	0.326	4.03
1155	0	67	9	1	0	0	1	0	0.99	1.13	3.53					4.71
1156	1	59	13	0	0	0	0	0	3.18	1.14	1.83	6.5	1.879	3.9	0.39	4.06
1157	0	39	10	1	0	0	1	0	1.22	1.4	4.47					6.06
1158	0	71	4	1	0	0	0	0	0.49	2.11	2.66	4.7	1.09	3.205	0.306	4.61
1159	0	59	10	0	0	0	1	0	2.11	0.71	4.09	6.2	1.934	3.038	0.471	5.54
1160	0	55	14	1	1	0	1	0	6.5	0.72	1.01	12.2	2.794	8.455	0.512	3.68
1161	0	48	5	1	1	0	1	0	3.33	1.01	2.97	8.7	2.488	5.394	0.487	5.02
1162	0	42	8	1	1	0	1	0	2.67	1.02	3.42	9.9	1.465	7.791	0.495	4.89
1163	0	47	19	1	0	0	0	0	0.81	1.04	2.11	7.3	1.497	4.884	0.759	3.32
1164	1	46	10	0	0	0	0	0	0.76	1.32	2.65	11.5	2.243	8.97	0.242	3.95
1165	0	75	6	1	0	0	0	0	1.36	1.06	2.96	6.7	1.494	4.402	0.616	4.22
1166	0	69	7	1	0	0	1	0	1.52	1.13	3.98					5.28
1167	0	68	7	1	0	0	1	0	1.03	1.32	2.41	10.3	3.286	5.85	0.906	3.83
1168	0	46	7	1	0	0	1	0	1.64	0.75	3.17	10	1.74	7.7	0.44	4.36
1169	0	41	12	1	0	0	1	0	1.42	0.78	4.4	14.9	1.371	12.814	0.581	5.61
1170	0	63	6	1	0	0	1	0	1.67	0.86	4.07	9	3.114	5.022	0.567	5.27
1171	0	48	5	1	0	0	1	0	1.93	1	2.58	8.1	3.208	4.18	0.502	3.98
1172	0	55	5	1	0	0	1	0	0.48	1.38	2.46	9.8	1.578	7.379	0.598	3.85
1173	0	79	16	1	1	0	1	0	0.51	0.96	2.72	7.9	1.904	5.064	0.506	3.67
1174	0	72	15	1	0	0	1	0	0.54	1.09	2.35	5.8	1.705	3.567	0.232	3.46
1175	0	36	20	1	0	0	0	0				10.1	3.858	4.878	0.758
1176	0	46	7	1	1	0	1	0	0.89	0.75	2.27	12.3	2.103	9.434	0.566	3.14
1177	0	57	6	1	0	0	1	0	2.05	0.86	1.79	6.6	1.98	3.854	0.488	3.08
1178	0	35	18	1	0	0	1	0	1.36	0.94	2.33	19.9	2.667	16.119	0.597	3.53
1179	0	67	5	1	0	0	1	0	0.94	1.6	1.61	8.3	0.963	6.922	0.282	3.38
1180	0	40	21	1	0	0	0	0	1.29	0.79	2.83	7.8	1.482	5.772	0.32	3.94
1181	0	59	5	0	0	0	0	0	1.67	1.04	3.58	9.4	2.275	6.495	0.442	4.98
1182	0	41	4	1	0	0	1	0	2.77	0.83	2.88	12.7	2.096	9.652	0.737	4.54
1183	0	88	5	1	0	0	1	0	0.72	1.07	2.16	5.3	1.738	2.841	0.631	3.4
1184	0	69	11	1	1	0	1	0	1.78	0.92	3.2	14.3	0.744	13.342	0.2	4.5
1185	0	59	8	1	1	0	1	0	1.53	1	3.03	7.3	1.672	5.095	0.467	4.22
1186	1	67	15	1	1	0	1	0	4.11	0.69	2.49	7	2.184	4.074	0.476	4.38
1187	0	72	10	1	1	0	1	0	1.03	0.92	2.94	15.4	0.955	13.922	0.462	4.03
1188	0	67	3	1	0	0	1	0				8.7	1.279	6.943	0.392
1189	0	40	2	1	0	0	0	0	1.5	0.98	4.57					5.84
1190	1	82	6	1	0	0	1	0	1.27	1.06	3.81	7.8	1.973	5.273	0.46	5.05
1191	0	79	12	1	0	0	1	1	1.72	0.7	2.56	4.8	0.902	3.466	0.35	4.03
1192	0	65	4	1	0	0	0	0	2.09	1.31	4.5					6.1
1193	1	51	22	1	1	0	1	0				8.4	1.823	5.804	0.546
1194	0	75	4	0	0	0	0	0	0.87	0.96	3.78	8	1.2	6.296	0.448	4.73
1195	0	55	8	1	0	0	1	0	0.88	1.42	3.76					5.16
1196	1	45	3	1	0	0	1	0	0.98	1.86	3.62					5.34
1197	0	61	10	1	1	0	1	0	3.06	0.83	4.08	6.9	1.96	4.14	0.511	5.53
1198	1	59	7	1	1	0	1	0	1.75	1.32	2.57	13	0.897	11.83	0.26	4.37
1199	0	57	4	1	0	0	1	0	2.03	0.96	1.88	7	1.54	4.802	0.399	3.18
1200	0	54	11	1	0	0	1	0	1.98	0.83	3.83	15.2	1.11	12.95	1.125	5.25
1201	0	101	6	1	0	0	1	0	0.86	1.11	1.59	8.1	2.025	5.387	0.429	2.79
1202	0	57	5	1	0	0	1	0	3.93	0.81	2.09	5.6	1.63	3.494	0.33	4.49
1203	1	52	10	1	1	0	0	0	3.04	0.95	3.38	15.9	1.145	14.135	0.557	5.35
1204	0	62	15	0	0	0	1	1				7.7	1.656	4.797	0.416
1205	0	81	7	1	1	0	1	0	2.18	0.86	1.77	6	2.472	3.102	0.312	3.31
1206	0	56	7	1	0	0	0	0	1.86	1.4	2.23	5.6	1.669	3.147	0.414	3.81
1207	0	47	5	1	0	0	1	0	3.02	1.5	3.97	8.2	1.509	6.224	0.443	5.91
1208	1	73	5	0	1	0	1	0	2.57	1.14	4.72	11.4	2.405	8.094	0.798	6.29
1209	0	43	5	1	1	0	0	0
1210	1	52	8	1	0	0	1	0	0.78	1.08	3.49	7.4	1.746	4.403	0.326	4.46
1211	0	66	7	1	0	0	1	1	1.57	0.6	0.53	3.2	0.291	2.099	0.33	1.66
1212	0	47	4	1	0	0	0	0	1.66	0.9	5.27	13.7	2.219	10.618	0.836	6.5
1213	0	68	6	1	1	0	1	0	3.88	1.27	5.31	12	0.936	10.368	0.648	7.28
1214	0	53	4	1	0	0	1	0
1215	0	60	11	1	0	0	1	0	1.04	1.11	4.35					5.53
1216	0	89	6	1	0	0	1	1	0.8	1.11	1.38	7.5	0.585	6.255	0.54	2.65
1217	0	81	9	1	0	0	1	0				8.8	1.17	7.154	0.361
1218	0	63	26	1	1	0	1	0	1.22	0.89	3.29	11.2	1.445	9.05	0.549	4.43
1219	0	75	12	0	1	0	1	0	0.94	0.97	3.13	11.9	1.095	9.115	0.988	4.3
1220	0	81	10	1	0	1	1	1				9.1	0.819	7.68	0.51
1221	0	66	4	0	1	1	1	0	1.05	1.41	2.47	7.3	2.329	4.336	0.475	4.05
1222	0	28	3	1	0	0	1	0	2.82	0.91	3.73	8.4	1.554	6.46	0.311	5.42
1223	0	57	4	1	0	0	1	0	7.43	0.85	1.91	11.6	3.062	7.412	0.731	4.84
1224	1	54	26	1	1	0	1	1	2.84	0.73	2.83	8.1	1.798	5.743	0.373	4.49
1225	0	73	8	0	0	0	0	1	0.9	1.16	2.8	9.1	1.547	6.78	0.637	4.17
1226	1	68	24	0	1	0	1	1	1.74	0.9	4	10.9	2.79	7.205	0.621	5.19
1227	0	69	5	0	0	0	1	0	0.6	1.34	3.98	6.7	1.722	3.719	0.543	5.17
1228	0	40	17	1	1	0	0	0	1.35	0.66	2.28	7.7	2.195	4.512	0.516	3.1
1229	0	72	8	1	1	1	1	0	1.21	0.86	0.96	6.4	1.165	4.422	0.544	2.21
1230	0	40	5	1	0	0	0	0	1.61	1.07	2.83	8.7	1.697	6.438	0.496	4.18
1231	0	78	8	1	0	0	1	0	1.22	0.83	3.82	6.2	1.445	3.931	0.496	4.95
1232	1	81	15	1	0	0	1	0	1.18	1.23	3.62	7.1	2.031	4.509	0.49	5.04
1233	1	49	7	1	1	0	1	0	1.06	0.99	3.07	5.8	1.467	4.066	0.22	4.23
1234	0	59	5	1	0	0	0	0	1.58	1.18	3.23	7.2	1.181	5.458	0.461	4.75
1235	0	34	7	1	0	0	1	0	2.22	1.03	4.24	10.9	1.602	8.6	0.567	5.57
1236	1	47	7	1	1	0	1	0	1.7	0.96	2.74					4.07
1237	1	53	4	1	0	0	1	0	2.81	1.22	3.48	12.4	1.686	9.932	0.62	5.31
1238	1	51	16	1	1	0	1	0	2.36	1.17	4.06	11.1	1.421	9.257	0.411	5.6
1239	0	55	5	1	1	0	1	0	0.38	1.28	1.14					2.53
1240	0	75	9	1	1	0	1	0	2.26	1.06	3.63					5.43
1241	0	84	8	1	1	0	0	0	1.8	0.89	2.7	5.8	1.566	3.642	0.389	3.9
1242	0	60	9	1	0	0	0	1	1.29	0.92	2.31	7.8	0.991	5.912	0.764	3.57
1243	1	70	15	1	1	0	1	1	2.89	1.06	4.57	6.2	1.779	3.925	0.397	5.92
1244	1	64	6	1	1	0	1	0	3.15	0.94	2.7	5.8	1.525	3.985	0.232	4.71
1245	0	52	7	1	1	0	1	0	1.96	0.98	3.78	6.5	2.067	3.777	0.403	4.96
1246	0	43	15	1	0	0	0	0	1.39	0.68	1.06	13.1	2.646	9.196	0.943	1.98
1247	0	52	7	1	0	0	1	0	1.16	0.82	2.39	10.2	0.887	9.007	0.275	3.34
1248	0	78	4	0	1	0	1	0	1.06	1.24	2.76	6.1	1.098	3.697	0.622	4.2
1249	1	57	10	0	0	0	1	0	1.31	1.46	3.41	6.9	2.084	4.244	0.352	4.96
1250	0	57	6	1	0	0	0	0	1.18	0.73	1.42	6.9	1.152	5.009	0.538	2.55
1251	1	41	9	1	0	0	1	0	1.14	1.2	3.08	4.8	0.907	3.6	0.202	4.36
1252	0	68	8	1	0	1	1	0	0.69	1.25	1.78	12.4	0.707	11.371	0.285	3.06
1253	0	66	5	1	0	0	1	0	2.96	0.61	2.92	5.4	1.863	3.121	0.302	4.36
1254	0	67	8	0	0	0	1	0	1.08	1.03	3.45	5.8	1.137	4.188	0.342	4.65
1255	0	68	15	0	1	0	1	0	2.95	0.88	3.3	7.7	1.532	5.344	0.547	4.93
1256	0	58	6	1	0	0	1	0	0.62	1.1	1.41	5.2	1.082	3.676	0.281	2.53
1257	0	55	13	1	1	0	1	0	1.72	0.71	2.98	6.8	0.932	5.406	0.381	4.2
1258	0	57	13	0	0	0	1	0	2.13	0.92	3.72	7.8	1.427	5.678	0.601	4.94
1259	0	54	12	0	0	0	1	0	1.35	0.74	2.2	5.8	1.212	4.188	0.313	3.19
1260	0	54	5	1	1	0	1	0	2.4	0.72	2.02	9.4	2.2	6.373	0.602	3.26
1261	0	60	5	1	0	0	1	0	1.7	0.94	4.48	12.8	0.576	11.994	0.205	5.88
1262	0	67	10	1	1	0	1	0	3.08	1.06	4.24	8	0.984	6.76	0.224	6.09
1263	1	81	8	1	0	0	1	1	0.59	1.54	3.23	7.6	1.094	6.224	0.22	4.71
1264	0	68	16	1	0	0	1	0	3	0.69	2.78	9.5	0.969	8.313	0.19	4.22
1265	0	67	11	1	0	0	1	0	1.02	0.87	2.88					3.88
1266	1	71	8	1	0	0	0	0	1.82	1.3	2.92	9.9	1.287	8.019	0.545	4.85
1267	0	83	15	1	0	0	1	0	1.5	0.9	2.13	6.5	0.345	5.948	0.163	3.26
1268	0	48	6	1	1	0	1	0	2.93	0.85	2.79	8.7	2.253	5.716	0.409	4.32
1269	0	54	10	1	1	0	0	0	2.23	1	2.01	8.4	0.974	6.392	0.605	3.99
1270	1	70	6	1	0	0	1	0	2.26	1.13	2.65	13.7	1.069	12.056	0.452	4.53
1271	1	71	1	1	0	0	1	0	0.71	1.17	4	10.6	0.933	9.317	0.329	5.18
1272	0	48	5	0	1	0	0	0	4.25	0.52	1.71	9.6	3.024	5.981	0.48	3.27
1273	1	59	7	1	1	0	1	0	2.9	0.72	2.25	6.8	1.095	5.304	0.238	3.91
1274	0	59	21	0	1	0	1	1	1.34	1.07	1.89	10.7	1.284	8.721	0.621	3.39
1275	0	81	11	0	0	0	1	1				5.6	0.392	4.766	0.381
1276	0	62	9	1	1	0	1	0	1.21	0.62	0.9	6.6	1.861	3.98	0.574	1.83
1277	0	59	4	1	0	0	0	0	0.85	1.15	2.68					3.82
1278	1	68	6	1	0	0	1	0	1.77	1.31	4.21	6.6	2.204	3.841	0.462	5.92
1279	0	73	4	1	0	0	1	0	1	1.49	2.08	5.9	0.502	5.186	0.201	3.55
1280	1	63	4	1	0	0	1	0
1281	0	67	6	1	0	0	1	0	1.73	1.02	4	9.7	0.825	7.838	0.718	5.31
1282	0	53	20	1	0	0	1	0	1.73	0.92	3.49	14.5	1.16	12.963	0.319	4.52
1283	1	75	7	0	0	1	1	0	1.58	0.94	4.01	8.9	1.495	6.248	0.81	5.34
1284	0	88	11	0	1	0	1	0	0.68	1.16	1.56	7.6	1.824	4.385	0.365	2.87
1285	0	53	12	1	1	0	1	0	3.29	0.91	1.93	10.3	3.574	5.263	0.968	3.38
1286	0	45	5	1	0	0	0	0	2.56	0.75	3.23	5.8	1.578	3.718	0.336	4.58
1287	0	79	9	1	1	0	1	0				8.3	2.133	5.461	0.598
1288	0	32	5	1	1	0	1	0	16.47	0.53	1.19	15	2.55	11.61	0.69	5.98
1289	0	65	15	1	0	0	0	0	0.55	1.52	1.79					3.34
1290	0	66	6	0	0	0	1	0	1.79	1.19	1.96	6.4	1.907	3.942	0.358	3.57
1291	0	56	10	1	0	0	0	0	2.86	0.93	2.13					3.6
1292	0	59	8	1	1	0	1	0				12.6	1.096	11.088	0.391
1293	0	52	5	1	0	0	1	0	1.25	1.15	3.2	5.9	1.239	4.124	0.342	4.53
1294	1	65	6	1	1	0	1	0	0.83	1.3	2.11	8.2	2.214	4.526	0.599	3.59
1295	1	78	9	1	0	1	1	1	0.86	1.25	2.93	9.7	1.319	7.382	0.737	4.28
1296	0	40	12	1	0	0	0	0	1.43	1.06	3.93	11.8	1.416	9.523	0.814	5.19
1297	0	55	18	0	1	0	1	0				9.1	2.393	6.133	0.482
1298	0	60	5	1	0	0	1	1	1.38	0.68	2.83	17	1.887	13.855	0.969	3.85
1299	1	57	9	1	1	0	1	0	6.4	0.78	2.64	11	2.123	8.118	0.605	5
1300	0	54	5	1	0	0	1	0	0.99	0.81	3.15	9.8	1.333	8.026	0.402	4.1
1301	0	73	18	1	0	0	1	0	1.71	0.8	1.85	6.1	1.952	3.117	0.573	3
1302	0	53	6	1	1	0	1	1	2.28	1.18	4.02					6.12
1303	0	72	12	0	0	0	1	0	0.63	1.32	2.82	6.3	1.153	4.379	0.46	4.46
1304	0	59	8	1	1	0	1	0	3.36	0.99	4.45	6.6	1.577	4.323	0.455	6.95
1305	0	75	7	1	0	0	0	0	1.54	0.87	3.11	11.7	0.983	9.887	0.749	4.87
1306	0	49	8	1	1	0	1	0				8.6	2.202	5.693	0.43
1307	0	54	3	1	0	0	0	0	2.67	0.87	3.08					4.78
1308	0	81	7	1	0	0	1	0	0.89	1.26	1.5	5.4	1.517	3.137	0.34	3.02
1309	0	84	11	1	0	0	1	0	1.15	0.96	2.89	6.6	2.587	3.142	0.561	4.34
1310	1	76	8	1	0	0	1	1	1.16	0.8	2.63	8.9	1.219	7.076	0.596	4.15
1311	0	69	5	0	0	0	0	0	0.91	0.63	2.56	7	1.841	4.438	0.42	3.68
1312	0	45	7	1	1	0	1	0	2.28	0.53	2.17					3.53
1313	0	80	11	1	0	0	1	0	1.55	1	3.2	9.2	0.607	7.986	0.451	4.73
1314	0	88	7	0	0	0	1	1	0.59	0.9	1.54	4.6	1.168	2.797	0.414	2.67
1315	0	50	13	0	0	0	1	0				6.4	0.922	4.288	0.525
1316	1	58	4	1	1	0	1	0	2.06	0.92	3					4.32
1317	1	79	7	0	0	0	1	0	2.08	0.77	3.62	6.8	1.754	4.638	0.313	4.91
1318	1	48	13	1	1	0	1	0	2.97	0.76	1.79	6.8	1.89	4.338	0.503	3.34
1319	1	64	9	1	0	0	1	0	3.65	1.1	3.45	11.3	1.537	8.825	0.554	5.55
1320	0	62	7	0	0	0	1	0	1.61	0.77	2.19	7.2	2.153	3.622	0.403	3.49
1321	1	56	2	0	0	0	1	0	2.97	0.77	3.25	8.7	2.828	5.177	0.531	5.27
1322	1	73	10	1	1	0	1	0	1.98	0.97	3.66	8.4	1.705	6.334	0.277	5.33
1323	0	62	5	1	0	0	0	0	0.73	0.83	2.15	6.9	1.87	4.375	0.593	2.96
1324	0	40	7	1	0	0	0	0	1.33	0.97	3.84					4.91
1325	1	93	30	1	0	1	1	0	0.74	1.82	2.11	7.2	1.217	5.09	0.713	3.87
1326	1	76	17	1	1	0	1	0	1.07	1.23	4	11.1	2.031	8.425	0.5	5.05
1327	1	51	7	1	1	0	0	0	4.26	0.78	3.79	12	1.176	10.152	0.48	5.58
1328	1	80	8	1	1	0	0	0	3.18	0.79	3.03	7.9	1.454	5.941	0.442	4.92
1329	1	63	18	0	0	0	0	0	4.05	0.91	2.75	8.6	2.546	5.341	0.585	4.82
1330	0	69	9	1	0	0	1	0	0.9	1.25	2.58					3.96
1331	0	56	9	1	0	0	1	0	1.3	1	3.15	12.8	1.011	10.842	0.704	4.49
1332	0	56	8	1	1	0	1	0	1.24	1.07	2.99	7.4	1.251	5.861	0.207	4.12
1333	1	53	6	1	0	0	0	0	0.81	1.82	2.55	6.7	1.863	4.355	0.322	4.3
1334	0	56	12	1	0	0	1	0	1	0.67	1.83					2.85
1335	0	54	11	0	0	0	1	0	1.01	0.76	3	15.7	2.716	11.351	1.193	3.99
1336	0	83	6	1	0	0	1	0	0.68	0.76	1.43					2.33
1337	0	71	5	1	1	0	1	0	3.92	1.01	3.11	10.8	1.264	7.787	0.864	5.09
1338	0	73	7	0	1	0	1	0	2.08	0.73	3.83	6.2	1.035	4.693	0.267	5.22
1339	0	72	7	1	1	1	1	0	1.46	0.77	1.6	7.5	1.125	5.708	0.495	2.75
1340	0	53	12	1	0	0	1	0	1.02	1.24	2.66	12.4	0.756	11.21	0.422	3.97
1341	0	47	6	1	0	0	0	0	3.41	0.75	2.24	12.6	2.419	8.656	0.869	3.87
1342	0	75	14	1	0	0	1	1	0.82	0.75	1.34	11.4	0.673	9.519	1.072	2.37
1343	0	47	17	1	0	0	1	0	1.84	1.17	6.42					7.61
1344	0	44	6	1	0	0	0	0	1.73	0.95	4	6.7	2.037	3.993	0.456	5.16
1345	1	57	7	1	0	0	1	0	1.11	1.16	3.44	7.1	1.385	5.19	0.405	4.93
1346	0	44	4	1	1	0	1	0	1.89	1.26	3.49	7.1	1.569	4.587	0.561	5.15
1347	0	75	13	1	0	0	1	0	1.08	0.88	2.18	9.1	2.639	5.405	0.737	3.53
1348	0	75	7	1	0	0	1	1	1.01	0.83	1.91					3.02
1349	0	40	3	1	0	0	0	0	1.5	0.95	3.85					5.27
1350	1	83	9	1	1	0	1	0	2.44	0.95	4.04					6.06
1351	0	66	4	1	0	0	1	0	0.83	1.11	2.36					3.65
1352	0	73	7	1	1	0	0	0				8.7	0.539	7.508	0.566
1353	0	55	8	1	1	0	1	0	0.98	1.01	3.6					4.82
1354	0	55	6	1	0	0	1	0	1.66	0.83	2.47					3.83
1355	0	59	4	1	0	0	1	0	2.43	1.62	3.6	6.6	1.287	4.858	0.416	5.93
1356	1	70	4	1	0	0	1	0	2.7	1.09	3.4					5.37
1357	0	67	13	0	0	0	1	0				7	1.491	4.809	0.35
1358	0	55	5	1	1	0	1	0	0.83	0.84	1.54	6.9	1.339	4.878	0.338	2.38
1359	1	71	5	1	1	0	1	0	4.32	0.63	2.44	12.2	1.513	9.98	0.598	4.34
1360	0	69	5	1	0	0	1	0	3.31	0.77	2.82	12.1	1.936	8.494	0.932	4.61
1361	0	47	4	1	0	0	1	0	1.11	1.18	4.61	3.9	1.287	2.2	0.172	6.18
1362	0	84	7	1	0	0	0	0	0.54	1.14	2.7	3.2	0.989	1.757	0.365	3.99
1363	1	73	15	0	1	0	1	1	1.66	1.13	5.03	10.7	1.733	8.207	0.642	6.85
1364	1	83	8	0	1	0	0	0	4.54	0.58	2.11	12.5	0.813	10.713	0.813	4.56
1365	1	62	6	1	0	0	1	0	1.09	1.18	2.63					4.03
1366	0	51	26	0	0	0	1	0	1.85	1	3.02	6.1	1.391	4.197	0.244	4.52
1367	1	86	9	0	1	0	1	0	2.18	1.05	3.37	9.7	1.484	7.682	0.456	4.91
1368	0	67	6	1	0	0	1	0	0.98	1.52	2.78					4.41
1369	0	44	8	1	0	0	1	0	1.91	0.78	3.24	12.9	1.471	10.668	0.645	4.51
1370	1	46	4	1	0	0	1	0	0.75	1.44	2.73					4.38
1371	0	39	27	1	0	0	1	0	6.46	0.83	2.61	9.3	3.013	5.71	0.428	5
1372	1	74	4	1	0	0	1	0	2.16	1.13	2.46					4.2
1373	0	74	8	1	0	0	1	0	1	1.23	3.1	5.5	1.309	3.647	0.429	4.68
1374	1	68	7	1	1	0	1	0	2.27	1.12	2.67	7.4	1.399	5.602	0.34	4.43
1375	1	73	12	1	0	1	1	0	1.16	1.17	1.3					2.79
1376	0	72	13	1	0	0	1	0	1.53	0.95	2.66	7.8	1.903	5.398	0.382	4.08
1377	1	80	5	0	0	0	0	0
1378	1	87	9	1	1	0	1	0	1.69	0.71	3.28	5.4	1.318	3.812	0.189	4.57
1379	0	59	19	0	1	0	1	0				7.3	2.321	4.241	0.569
1380	0	81	5	1	0	0	0	1	0.74	1.2	3.01					4.45
1381	0	76	6	1	1	0	1	0	1.25	0.81	1.29					2.35
1382	0	60	19	1	0	0	1	0	1.78	0.9	3.63	5.9	1.794	3.593	0.372	4.92
1383	1	89	7	0	0	0	1	1	1.23	0.84	1.77	15.4	0.77	13.583	0.986	3.03
1384	0	57	5	1	0	0	1	0				9.8	2.45	6.566	0.637
1385	0	71	4	1	0	0	1	0	0.59	1.18	3.09					4.28
1386	0	54	5	1	1	0	0	0	5.18	0.88	3.31	7.7	2.156	4.789	0.508	5.43
1387	0	75	5	1	0	0	0	0	1.1	1.22	2.72	3.7	1.776	1.373	0.311	4.2
1388	0	72	10	0	1	0	1	0	0.93	0.79	1.84	4.2	0.798	2.675	0.517	2.97
1389	0	62	6	1	1	0	1	0	0.73	1.22	2.4	8.5	2.134	5.466	0.612	3.77
1390	0	46	7	0	0	0	0	0	0.51	1.42	2.93	8.6	1.608	6.536	0.327	4.38
1391	0	78	11	1	1	1	1	0	1.89	1.33	4.75					6.77
1392	0	58	6	1	1	0	1	0	1.93	1.75	5.03					7.41
1393	0	55	10	1	0	0	1	0	0.84	1.16	2.26	8.6	1.6	6.459	0.473	3.69
1394	1	74	8	1	0	1	0	0	0.45	1.49	1.34	6.3	0.542	5.531	0.151	2.92
1395	1	72	15	1	1	0	1	0				11	1.441	8.701	0.781
1396	0	65	4	1	0	0	0	0	1.41	0.99	2.74	5.1	1.663	2.749	0.51	4.04
1397	0	63	13	1	0	0	1	0	1.81	0.98	2.08	9.6	2.035	6.739	0.653	3.67
1398	0	69	8	1	0	0	0	0				10.3	1.411	7.684	0.948
1399	1	75	6	1	0	0	1	0	1.32	1.81	3.62	4.5	0.864	3.375	0.212	5.82
1400	0	63	4	1	0	0	0	0	0.76	1.24	3.42	4	1.436	2.048	0.396	4.92
1401	0	86	11	1	0	0	1	0	0.9	0.88	0.77					1.92
1402	0	45	6	1	1	0	1	0	3.09	0.97	3.65					5.6
1403	0	54	4	1	0	0	0	0	0.75	1.43	3.67	7.2	0.922	6.034	0.223	5.42
1404	0	55	5	1	0	0	1	0	1.73	0.96	3.39					5.1
1405	1	50	4	1	0	0	1	0	1.77	0.99	3.71	6.3	1.663	4.045	0.41	5.35
1406	0	35	9	1	1	0	1	0	2.76	1.45	3.02	8.6	2.881	5.022	0.413	5.15
1407	0	55	10	1	0	0	1	0	2.17	0.36	1.07	11.5	1.139	9.2	0.943	2.76
1408	0	47	4	1	0	0	1	0	1.11	1.02	3.21					4.62
1409	1	55	2	1	1	0	1	0	1.28	1.52	3.95	7.3	1.964	4.876	0.38	5.77
1410	0	46	5	1	1	0	1	0	2.66	0.94	2.56	8.7	1.575	6.421	0.6	4.46
1411	0	57	5	1	0	0	1	0	0.96	1.61	2.7	6.4	2.182	3.61	0.352	4.72
1412	1	64	7	0	0	0	1	0	1.6	1.22	2.82	7.8	2.114	4.797	0.429	4.66
1413	0	55	5	1	1	0	1	0	2.03	1.24	5.18	2.5	0.858	1.375	0.178	7.41
1414	0	51	5	1	1	0	0	0	3.7	0.75	1.96	7.2	2.513	3.701	0.756	3.94
1415	0	37	10	1	0	0	1	0	1.53	0.84	2.66					4.13
1416	1	70	17	1	1	0	1	0	2.09	1.28	3.17	10	1.16	8.37	0.45	5.17
1417	0	54	6	1	1	0	1	1	2.9	1.2	3.56	8.8	1.496	6.336	0.722	5.91
1418	1	76	6	1	1	0	1	0	2.75	0.9	3.35	6.2	1.593	4.111	0.391	5.35
1419	1	65	9	1	1	0	1	0	4.41	0.93	2.48	8.4	2.453	5.494	0.412	5.08
1420	0	51	8	1	0	0	1	0	2.63	0.92	3.1	8	1.2	6.512	0.232	5.12
1421	0	89	6	0	1	0	1	0	1.23	0.73	1.18	7.8	1.498	5.351	0.702	2.36
1422	0	54	20	1	0	0	0	0	2.67	0.82	2.76	7.3	1.796	4.862	0.533	4.63
1423	0	59	6	1	0	0	1	0				8.3	1.569	6.267	0.415
1424	1	56	5	1	0	0	1	0	1.1	1.59	2.88	4.6	2.024	2.208	0.281	4.86
1425	0	40	2	1	1	0	1	0	17.6	0.59	1.12					6.33
1426	0	51	7	1	0	0	1	0				8.9	0.481	7.529	0.863
1427	0	53	21	1	1	0	1	0	2.4	0.88	1.65	8.6	0.903	7.37	0.232	3.37
1428	0	51	5	1	1	0	1	0	1.51	0.95	3.45	7.3	2.54	4.161	0.358	5.16
1429	0	47	6	1	0	0	1	0	1.07	0.94	3.6	7	1.715	4.522	0.49	5.21
1430	0	39	4	1	0	0	1	0	3.72	0.74	3.32	12.5	2.163	9.563	0.638	5.47
1431	0	70	13	1	1	0	1	0	2.06	0.74	2.7	8	1.28	6.056	0.44	4.39
1432	0	70	5	1	0	0	0	0	1.14	0.78	2.65	8.7	2.471	5.342	0.618	4.07
1433	0	77	4	1	0	0	1	0	1.71	0.7	2.73					4.18
1434	0	67	11	1	0	1	1	0	0.6	0.88	2.1					3.23
1435	0	64	4	1	0	0	1	0	0.74	0.83	3.62	7.9	1.343	6.186	0.34	4.74
1436	0	53	10	1	0	0	0	0	0.99	0.89	1.65					2.91
1437	0	77	10	1	0	0	1	0	1.07	1.45	2.43	7	1.631	4.354	0.532	4.32
1438	0	56	5	1	0	0	1	0	0.66	1.31	4.09	6.4	1.498	4.384	0.467	6.03
1439	0	53	5	1	0	0	1	0	1.93	0.8	3.33	5.8	1.044	4.489	0.22	4.85
1440	0	59	5	1	0	0	0	0
1441	0	45	11	1	0	0	1	1	1.5	0.76	4.07	10.7	1.284	8.828	0.503	5.5
1442	0	50	6	1	0	0	0	0	2.21	0.95	4.59	9.6	1.325	7.997	0.25	6.56
1443	0	65	5	1	0	0	1	0	1.15	1.09	3.21	6.1	1.861	3.733	0.397	4.78
1444	0	73	10	1	0	0	1	0	1.38	0.74	2.4	8.4	1.411	5.821	0.672	3.69
1445	0	42	4	1	1	0	1	0	3.61	1.14	3.56					5.74
1446	1	76	23	0	1	0	1	0	0.85	0.69	1.83	7.6	2.28	4.826	0.418	2.99
1447	0	70	4	1	0	0	1	0	1.36	0.99	3.29	6.5	1.424	4.043	0.377	4.78
1448	0	60	13	1	0	0	1	0	0.82	0.98	2.04	4.2	0.785	2.923	0.248	3.32
1449	0	49	7	1	0	0	1	0	2.24	1.01	4.69	7.2	1.706	5.018	0.302	6.62
1450	0	56	17	1	0	0	1	0	1.41	1.74	1.63					3.9
1451	0	51	5	1	1	0	1	0	1.24	0.95	1.72	6.5	1.534	4.739	0.182	3.11
1452	0	55	7	1	0	0	1	0	2.86	0.72	2.13	8.4	2.554	4.822	0.613	3.79
1453	0	78	11	1	0	0	1	0	4.19	0.72	2.13	7.1	2.244	4.239	0.398	5.11
1454	0	51	5	1	0	0	1	0	3.99	1.06	4.31					6.53
1455	1	66	9	1	0	0	1	0	1.05	1.4	3.69	5.7	1.026	4.309	0.302	5.65
1456	0	66	11	1	1	0	1	0	4.13	0.73	2.06	6.6	1.353	4.719	0.416	4.83
1457	0	51	9	1	0	0	0	0	0.59	1.24	2.03	14.9	1.073	13.455	0.313	3.5
1458	1	55	6	1	0	0	1	0	1.28	0.9	4.32	7.3	1.883	4.833	0.416	5.88
1459	0	47	22	1	0	0	1	0	2.17	0.72	2.74	8.2	1.829	6.06	0.262	4.27
1460	0	54	9	1	0	0	1	0	1.83	0.79	4.03	8.4	0.664	7.568	0.151	5.49
1461	0	47	6	1	0	0	1	0	2.04	0.69	3	6.4	1.888	3.91	0.371	4.4
1462	0	45	5	1	0	0	1	0	1.09	1.18	2.83	7.7	1.517	5.729	0.4	4.37
1463	1	55	5	1	0	0	1	0	1.24	1.02	2.84					4.49
1464	0	77	7	1	0	0	1	0				10.2	2.111	6.987	0.745
1465	1	74	9	1	1	0	1	0				13.3	1.37	11.358	0.519
1466	0	48	4	1	1	0	1	0	1.88	0.87	3.81	7.8	2.122	5.288	0.242	5.4
1467	1	37	10	1	0	0	1	0	3.1	1.09	3.68					5.72
1468	0	68	9	1	0	1	1	0	1.24	1.29	2.82	4.3	1.088	2.765	0.249	4.75
1469	0	74	5	0	0	0	0	0	0.56	1.44	2.71	6.3	1.789	3.812	0.328	4.41
1470	0	68	15	1	0	0	1	1	0.95	0.73	1.7	9.6	0.355	8.602	0.557	2.9
1471	0	42	4	1	1	0	1	0	2.07	0.9	3.41	6	1.962	3.528	0.33	5.2
1472	0	54	6	1	0	0	1	0	0.71	1.44	2.93	11.9	1.535	9.841	0.464	4.7
1473	1	62	8	1	0	0	1	0	2.87	1.14	2.06	9.7	1.843	7.353	0.446	4.05
1474	0	53	7	1	0	0	1	0	3.22	1.04	4.21	6.8	2.468	3.556	0.469	6.41
1475	1	55	12	1	0	0	1	0	0.55	1.77	4.03					5.95
1476	0	52	5	1	0	0	1	0	0.81	1.05	3.65	10.9	1.646	8.11	0.763	5.3
1477	0	72	7	1	0	0	1	0				4.9	0.755	3.332	0.333
1478	0	57	5	0	1	0	1	0	1.98	1.25	5.15	10	3.49	6.09	0.32	7.28
1479	0	58	7	1	1	0	1	0	1.19	0.89	2.95	9.7	2.454	6.218	0.378	4.37
1480	1	79	15	1	1	0	0	0	1.79	1.29	2.59					4.55
1481	1	74	13	1	1	0	1	0	1.1	1.13	1.8					3.35
1482	0	88	9	1	0	0	0	0	1.12	1.1	3.01	6.8	1.115	4.515	0.292	4.72
1483	0	65	11	1	0	0	1	0
1484	0	80	10	1	0	0	1	0	1.76	0.83	2.63	8	2.12	4.624	0.52	4.26
1485	0	45	8	1	1	0	1	0	1.7	0.9	3.02	4.7	1.833	2.449	0.23	4.5
1486	0	65	8	1	1	0	1	0	1.29	1.06	3.39	8.9	2.999	5.313	0.498	4.82
1487	1	58	4	1	0	0	1	0	1.33	1.26	3.5					5.2
1488	1	86	5	0	1	0	1	0	1.52	0.96	3.89	7.9	1.778	5.696	0.34	5.55
1489	0	83	5	1	0	0	0	0	1.01	0.93	3.22	5.4	1.642	3.289	0.34	4.56
1490	0	56	7	1	0	0	1	0	2.55	0.69	3.84	7.9	0.995	6.699	0.142	5.5
1491	0	59	8	1	0	0	1	0	1.04	1.47	3.92	10	1.23	8.19	0.55	5.86
1492	0	47	5	1	0	0	1	0	1.05	0.69	2.59					3.71
1493	0	34	9	1	0	0	1	0	1.42	0.83	2.6	13.1	1.362	10.952	0.629	4.01
1494	0	45	13	1	0	0	1	0	0.8	1	1.22					2.63
1495	0	66	8	1	1	1	1	1				9	0.819	7.515	0.63
1496	1	68	10	0	1	0	1	1				7.1	1.278	5.275	0.398
1497	0	55	6	1	0	0	1	0	0.88	1.19	2.33	10.8	0.659	9.774	0.346	3.73
1498	1	80	15	1	0	1	1	0	2.27	0.7	2.88	4.9	1.475	2.773	0.593	4.75
1499	0	65	5	1	1	0	1	0	1.15	1.06	2.81	8.1	1.563	6.059	0.421	4.37
1500	0	48	7	1	1	0	1	0	2.13	0.97	2.6	10.2	2.662	6.752	0.5	4.05
1501	1	47	7	1	0	0	1	0	1.06	1.44	2.93	11.5	1.001	9.959	0.518	4.79
1502	0	69	8	1	0	0	1	0	1.18	0.9	1.58	5.3	1.161	3.334	0.292	2.95
1503	1	72	2	1	1	0	0	0	0.99	1.25	2.37	6.3	1.348	4.36	0.46	4.09
1504	0	65	4	1	0	0	0	0	0.84	0.97	2.46	5.5	1.375	3.383	0.578	3.9
1505	0	38	19	1	0	0	0	0	3.46	0.82	3.22	8.5	1.904	5.721	0.4	5.25
1506	0	87	14	1	0	0	1	0	0.81	1.14	2.51	7.5	1.448	5.22	0.188	4
1507	1	84	10	1	0	0	1	0	1.15	1.06	2.42	8.5	2.049	5.721	0.536	4.04
1508	1	48	9	1	1	0	1	0	3.3	0.64	3.04	9.7	2.474	6.286	0.795	4.63
1509	0	54	8	1	1	0	1	0	3.24	0.81	3.49	6.7	1.776	4.02	0.623	4.93
1510	0	75	10	1	0	0	1	0	1.34	0.82	1.25	5.6	1.036	3.909	0.414	2.55
1511	0	52	8	1	0	0	1	0	1.16	0.89	2.07					3.47
1512	0	52	5	1	0	0	1	0	5.55	0.8	2.97					4.37
1513	0	42	15	1	0	0	0	0	0.76	1.24	3.43					5.14
1514	0	54	7	1	1	0	1	0	3.49	0.9	4.01	7.6	1.406	5.624	0.357	6.08
1515	0	69	10	1	0	0	1	0	1.44	0.98	2.62	7.5	1.148	5.993	0.263	4.21
1516	0	58	6	1	1	0	0	0	1.78	0.78	2.28					3.66
1517	0	62	6	1	1	0	1	0	1.79	0.64	1.16	7	1.932	4.431	0.546	2.39
1518	0	46	7	1	0	0	1	0				7.7	1.255	5.998	0.293
1519	0	50	4	1	0	0	0	0	0.9	1.19	3.41	6.8	1.333	5.154	0.252	4.91
1520	0	59	10	1	1	0	1	0	0.95	1.38	3.11	7.6	1.733	5.282	0.494	4.73
1521	0	47	5	1	0	0	1	0	1.48	0.89	4.06	7.8	1.638	5.413	0.374	5.45
1522	1	78	7	1	1	0	1	0	0.93	1.12	1.47	7.3	1.453	4.84	0.321	3.03
1523	0	49	6	1	0	0	1	0	1.01	1.19	3.3	9.6	0.749	8.41	0.394	5.05
1524	0	74	8	0	1	0	0	0	1.21	0.88	2.03	5.6	1.534	3.377	0.459	3.46
1525	1	51	2	1	0	0	0	0				5.9	1.569	3.87	0.372
1526	1	78	5	0	1	0	1	0	6.17	0.73	2.08	5.6	1.215	3.842	0.33	5.6
1527	0	59	11	1	0	1	1	0	1.94	1.2	4.67	6	0.978	4.446	0.378	6.53
1528	1	65	5	0	0	0	1	0	2.08	1.09	2.98	6.5	1.638	4.381	0.371	4.72
1529	0	49	4	0	0	0	1	0	2.56	0.66	3.28	11.2	3.427	7.011	0.616	4.84
1530	0	67	11	1	0	0	1	0	1.24	1.04	2.72	8	2.264	5.144	0.328	4.23
1531	0	67	19	1	0	0	1	0	1.94	0.84	2.93					4.32
1532	0	44	15	1	1	0	1	0	3.09	0.73	3.26	11.2	2.43	8.131	0.538	4.96
1533	1	77	9	1	1	0	1	0	2.87	0.71	1.89	15.6	0.952	13.4	1.17	3.52
1534	0	68	3	1	1	1	0	0	1.64	0.81	3.17					4.52
1535	0	71	10	0	0	0	1	0	1.85	1.12	2.37	2.9	0.748	1.859	0.264	4.14
1536	1	44	7	1	0	0	0	1	1.23	1.2	1.81	3.1	1.29	1.562	0.22	3.38
1537	0	72	10	1	1	0	1	0	2.2	1.3	2.24	7.2	1.512	4.838	0.432	4.07
1538	0	59	13	0	1	0	1	0	1.79	1.44	1.68	4.5	0.747	3.425	0.27	3.68
1539	1	72	9	1	0	0	1	0	1.24	1.14	2.65					4.34
1540	1	51	8	1	0	0	0	0	1.13	1.21	3.65					5.32
1541	1	78	19	1	0	0	1	0	1.04	1.23	3.92	6.4	2.451	3.405	0.282	5.59
1542	1	93	6	1	0	0	1	1	0.62	1.46	2.69	9.1	1.383	6.343	0.865	4.47
1543	1	56	6	1	0	0	1	0	3.65	0.78	2.1					4.04
1544	0	57	9	1	0	0	1	0	2.56	1.27	4.27	8.7	0.887	7.091	0.4	6.59
1545	0	34	18	1	0	0	0	0	1.16	1.04	3.16	14.8	1.051	12.994	0.666	4.75
1546	0	36	8	1	0	0	1	0	3.22	1.03	3.26	8.3	2.034	5.893	0.34	5.51
1547	0	42	19	1	0	0	1	0	2.7	0.84	2.26					4
1548	0	49	7	1	0	0	1	0	1.82	0.86	3.24	9.9	3.406	5.801	0.505	4.88
1549	0	70	6	1	1	0	1	0	0.93	1.22	2.56	5	1.725	2.885	0.28	4.07
1550	1	75	14	0	1	1	1	0				5.8	1.247	3.938	0.47
1551	1	48	6	1	1	0	1	0				9.6	1.853	6.998	0.643
1552	0	57	8	1	0	0	1	0	1.77	1.58	4	4.7	1.161	3.215	0.244	6.19
1553	1	53	7	1	0	0	1	0	0.47	1.65	2.59	5.5	0.891	4.356	0.242	4.32
1554	0	48	9	0	1	0	0	0	1.88	1.13	3.54	5.9	1.092	4.278	0.413	5.44
1555	0	73	4	1	0	0	1	0	0.56	1.41	2.06	6.3	1.26	4.397	0.41	3.69
1556	0	67	6	1	0	0	1	0	0.81	0.81	1.84	12.5	0.863	11.05	0.375	2.99
1557	0	50	7	1	0	0	1	0	1.66	1.33	3.6	5.6	1.68	3.147	0.336	5.55
1558	1	49	7	1	0	0	1	0	0.9	1.32	3.52	15.6	1.42	13.572	0.546	5.26
1559	1	67	7	1	0	0	1	0	1.76	1.04	4.03	5.6	1.198	4.172	0.19	6.01
1560	0	54	5	1	0	0	1	0	0.64	1.34	1.57	12.2	1.244	10.175	0.586	3.25
1561	1	69	7	1	1	0	1	0	4.19	0.69	2.7	8	2.04	5.344	0.504	4.94
1562	0	49	9	1	0	0	1	0	1.39	1.29	4.56	11.9	2.404	8.485	0.75	6.33
1563	0	63	3	1	1	0	1	0	2.26	0.96	2.9	6.8	1.299	4.882	0.476	4.69
1564	1	74	5	1	1	0	1	0	3.35	0.7	3.39	4.5	1.404	2.574	0.252	5.44
1565	0	58	4	1	0	0	1	0	2.13	0.83	2.13					3.58
1566	1	44	5	1	1	0	1	0
1567	0	54	8	1	0	0	1	0	2.65	1.04	3.01	8.4	0.882	6.905	0.479	4.87
1568	0	43	8	1	0	0	1	0	1.63	0.84	3.95	7.7	2.71	4.281	0.4	5.35
1569	0	71	5	1	0	0	1	0	2.14	1	3.52					5.33
1570	0	56	5	1	0	0	0	0	1.81	0.89	4.99	14.5	2.161	11.296	0.609	6.41
