# Supplementary material for: Association between lymphocyte-to-monocyte ratio and stroke-associated pneumonia: a retrospective cohort study
Source: PeerJ. 2024 Sep 19;12:e18066. doi: 10.7717/peerj.18066 (PMC11639142; doi:10.7717/peerj.18066)
Supplement: Supplemental Information 2 [file peerj-12-18066-s002.xlsx]

## Sheet: Sheet1
ID	ID
Sex	1: male; 0: woman
Age, year	year
Hospitalization, days	days
within 72 hours of symptom onset	1: yes;0: no
Diabetes	1: yes;1: no
Atrial fibrillation	1: yes;2: no
Hypertension	1: yes;3: no
SAP	1: yes;4: no
TG,mmol/l	mmol/l
HDL-C,mmol/l	mmol/l
LDL-C,mmol/l	mmol/l
WBC	10^9/L
Lymphocytes	10^10/L
Neutrophils	10^11/L
Monocyte	10^12/L
TC ,mmol/l	mmol/l
ID
Sex
Age, year
Hospitalization, days
within 72 hours of symptom onset
Diabetes
Atrial fibrillation
Hypertension
SAP
TG
HDL-C,mmol/l
LDL-C,mmol/l
WBC
Lymphocytes
Neutrophils
Monocyte
TC
ID
Sex
Age, year
Hospitalization, days
within 72 hours of symptom onset
Diabetes
Atrial fibrillation
Hypertension
SAP
TG
HDL-C,mmol/l
LDL-C,mmol/l
WBC
Lymphocytes
Neutrophils
Monocyte
TC
ID
Sex
Age, year
Hospitalization, days
within 72 hours of symptom onset
Diabetes
Atrial fibrillation
Hypertension
SAP
TG
HDL-C,mmol/l
LDL-C,mmol/l
WBC
Lymphocytes
Neutrophils
Monocyte
TC
ID
Sex
Age, year
Hospitalization, days
within 72 hours of symptom onset
Diabetes
Atrial fibrillation
Hypertension
SAP
TG
HDL-C,mmol/l
LDL-C,mmol/l
WBC
Lymphocytes
Neutrophils
Monocyte
TC
ID
Sex
Age, year
Hospitalization, days
within 72 hours of symptom onset
Diabetes
Atrial fibrillation
Hypertension
SAP
TG
HDL-C,mmol/l
LDL-C,mmol/l
WBC
Lymphocytes
Neutrophils
Monocyte
TC
ID
Sex
Age, year
Hospitalization, days
within 72 hours of symptom onset
Diabetes
Atrial fibrillation
Hypertension
SAP
TG
HDL-C,mmol/l
LDL-C,mmol/l
WBC
Lymphocytes
Neutrophils
Monocyte
TC
ID
Sex
Age, year
Hospitalization, days
within 72 hours of symptom onset
Diabetes
Atrial fibrillation
Hypertension
SAP
TG
HDL-C,mmol/l
LDL-C,mmol/l
WBC
Lymphocytes
Neutrophils
Monocyte
TC
ID
Sex
Age, year
Hospitalization, days
within 72 hours of symptom onset
Diabetes
Atrial fibrillation
Hypertension
SAP
TG
HDL-C,mmol/l
LDL-C,mmol/l
WBC
Lymphocytes
Neutrophils
Monocyte
TC
ID
Sex
Age, year
Hospitalization, days
within 72 hours of symptom onset
Diabetes
Atrial fibrillation
Hypertension
SAP
TG
HDL-C,mmol/l
LDL-C,mmol/l
WBC
Lymphocytes
Neutrophils
Monocyte
TC
ID
Sex
Age, year
Hospitalization, days
within 72 hours of symptom onset
Diabetes
Atrial fibrillation
Hypertension
SAP
TG
HDL-C,mmol/l
LDL-C,mmol/l
WBC
Lymphocytes
Neutrophils
Monocyte
TC
ID
Sex
Age, year
Hospitalization, days
within 72 hours of symptom onset
Diabetes
Atrial fibrillation
Hypertension
SAP
TG
HDL-C,mmol/l
LDL-C,mmol/l
WBC
Lymphocytes
Neutrophils
Monocyte
TC
ID
Sex
Age, year
Hospitalization, days
within 72 hours of symptom onset
Diabetes
Atrial fibrillation
Hypertension
SAP
TG
HDL-C,mmol/l
LDL-C,mmol/l
WBC
Lymphocytes
Neutrophils
Monocyte
TC
ID
Sex
Age, year
Hospitalization, days
within 72 hours of symptom onset
Diabetes
Atrial fibrillation
Hypertension
SAP
TG
HDL-C,mmol/l
LDL-C,mmol/l
WBC
Lymphocytes
Neutrophils
Monocyte
TC
ID
Sex
Age, year
Hospitalization, days
within 72 hours of symptom onset
Diabetes
Atrial fibrillation
Hypertension
SAP
TG
HDL-C,mmol/l
LDL-C,mmol/l
WBC
Lymphocytes
Neutrophils
Monocyte
TC
ID
Sex
Age, year
Hospitalization, days
within 72 hours of symptom onset
Diabetes
Atrial fibrillation
Hypertension
SAP
TG
HDL-C,mmol/l
LDL-C,mmol/l
WBC
Lymphocytes
Neutrophils
Monocyte
TC
ID
Sex
Age, year
Hospitalization, days
within 72 hours of symptom onset
Diabetes
Atrial fibrillation
Hypertension
SAP
TG
HDL-C,mmol/l
LDL-C,mmol/l
WBC
Lymphocytes
Neutrophils
Monocyte
TC
ID
Sex
Age, year
Hospitalization, days
within 72 hours of symptom onset
Diabetes
Atrial fibrillation
Hypertension
SAP
TG
HDL-C,mmol/l
LDL-C,mmol/l
WBC
Lymphocytes
Neutrophils
Monocyte
TC
ID
Sex
Age, year
Hospitalization, days
within 72 hours of symptom onset
Diabetes
Atrial fibrillation
Hypertension
SAP
TG
HDL-C,mmol/l
LDL-C,mmol/l
WBC
Lymphocytes
Neutrophils
Monocyte
TC
ID
Sex
Age, year
Hospitalization, days
within 72 hours of symptom onset
Diabetes
Atrial fibrillation
Hypertension
SAP
TG
HDL-C,mmol/l
LDL-C,mmol/l
WBC
Lymphocytes
Neutrophils
Monocyte
TC
ID
Sex
Age, year
Hospitalization, days
within 72 hours of symptom onset
Diabetes
Atrial fibrillation
Hypertension
SAP
TG
HDL-C,mmol/l
LDL-C,mmol/l
WBC
Lymphocytes
Neutrophils
Monocyte
TC
ID
Sex
Age, year
Hospitalization, days
within 72 hours of symptom onset
Diabetes
Atrial fibrillation
Hypertension
SAP
TG
HDL-C,mmol/l
LDL-C,mmol/l
WBC
Lymphocytes
Neutrophils
Monocyte
TC
ID
Sex
Age, year
Hospitalization, days
within 72 hours of symptom onset
Diabetes
Atrial fibrillation
Hypertension
SAP
TG
HDL-C,mmol/l
LDL-C,mmol/l
WBC
Lymphocytes
Neutrophils
Monocyte
TC
ID
Sex
Age, year
Hospitalization, days
within 72 hours of symptom onset
Diabetes
Atrial fibrillation
Hypertension
SAP
TG
HDL-C,mmol/l
LDL-C,mmol/l
WBC
Lymphocytes
Neutrophils
Monocyte
TC
ID
Sex
Age, year
Hospitalization, days
within 72 hours of symptom onset
Diabetes
Atrial fibrillation
Hypertension
SAP
TG
HDL-C,mmol/l
LDL-C,mmol/l
WBC
Lymphocytes
Neutrophils
Monocyte
TC
ID
Sex
Age, year
Hospitalization, days
within 72 hours of symptom onset
Diabetes
Atrial fibrillation
Hypertension
SAP
TG
HDL-C,mmol/l
LDL-C,mmol/l
WBC
Lymphocytes
Neutrophils
Monocyte
TC
ID
Sex
Age, year
Hospitalization, days
within 72 hours of symptom onset
Diabetes
Atrial fibrillation
Hypertension
SAP
TG
HDL-C,mmol/l
LDL-C,mmol/l
WBC
Lymphocytes
Neutrophils
Monocyte
TC
ID
Sex
Age, year
Hospitalization, days
within 72 hours of symptom onset
Diabetes
Atrial fibrillation
Hypertension
SAP
TG
HDL-C,mmol/l
LDL-C,mmol/l
WBC
Lymphocytes
Neutrophils
Monocyte
TC
ID
Sex
Age, year
Hospitalization, days
within 72 hours of symptom onset
Diabetes
Atrial fibrillation
Hypertension
SAP
TG
HDL-C,mmol/l
LDL-C,mmol/l
WBC
Lymphocytes
Neutrophils
Monocyte
TC
ID
Sex
Age, year
Hospitalization, days
within 72 hours of symptom onset
Diabetes
Atrial fibrillation
Hypertension
SAP
TG
HDL-C,mmol/l
LDL-C,mmol/l
WBC
Lymphocytes
Neutrophils
Monocyte
TC
ID
Sex
Age, year
Hospitalization, days
within 72 hours of symptom onset
Diabetes
Atrial fibrillation
Hypertension
SAP
TG
HDL-C,mmol/l
LDL-C,mmol/l
WBC
Lymphocytes
Neutrophils
Monocyte
TC
ID
Sex
Age, year
Hospitalization, days
within 72 hours of symptom onset
Diabetes
Atrial fibrillation
Hypertension
SAP
TG
HDL-C,mmol/l
LDL-C,mmol/l
WBC
Lymphocytes
Neutrophils
Monocyte
TC
ID
Sex
Age, year
Hospitalization, days
within 72 hours of symptom onset
Diabetes
Atrial fibrillation
Hypertension
SAP
TG
HDL-C,mmol/l
LDL-C,mmol/l
WBC
Lymphocytes
Neutrophils
Monocyte
TC
ID
Sex
Age, year
Hospitalization, days
within 72 hours of symptom onset
Diabetes
Atrial fibrillation
Hypertension
SAP
TG
HDL-C,mmol/l
LDL-C,mmol/l
WBC
Lymphocytes
Neutrophils
Monocyte
TC
ID
Sex
Age, year
Hospitalization, days
within 72 hours of symptom onset
Diabetes
Atrial fibrillation
Hypertension
SAP
TG
HDL-C,mmol/l
LDL-C,mmol/l
WBC
Lymphocytes
Neutrophils
Monocyte
TC
ID
Sex
Age, year
Hospitalization, days
within 72 hours of symptom onset
Diabetes
Atrial fibrillation
Hypertension
SAP
TG
HDL-C,mmol/l
LDL-C,mmol/l
WBC
Lymphocytes
Neutrophils
Monocyte
TC
ID
Sex
Age, year
Hospitalization, days
within 72 hours of symptom onset
Diabetes
Atrial fibrillation
Hypertension
SAP
TG
HDL-C,mmol/l
LDL-C,mmol/l
WBC
Lymphocytes
Neutrophils
Monocyte
TC
ID
Sex
Age, year
Hospitalization, days
within 72 hours of symptom onset
Diabetes
Atrial fibrillation
Hypertension
SAP
TG
HDL-C,mmol/l
LDL-C,mmol/l
WBC
Lymphocytes
Neutrophils
Monocyte
TC
ID
Sex
Age, year
Hospitalization, days
within 72 hours of symptom onset
Diabetes
Atrial fibrillation
Hypertension
SAP
TG
HDL-C,mmol/l
LDL-C,mmol/l
WBC
Lymphocytes
Neutrophils
Monocyte
TC
ID
Sex
Age, year
Hospitalization, days
within 72 hours of symptom onset
Diabetes
Atrial fibrillation
Hypertension
SAP
TG
HDL-C,mmol/l
LDL-C,mmol/l
WBC
Lymphocytes
Neutrophils
Monocyte
TC
ID
Sex
Age, year
Hospitalization, days
within 72 hours of symptom onset
Diabetes
Atrial fibrillation
Hypertension
SAP
TG
HDL-C,mmol/l
LDL-C,mmol/l
WBC
Lymphocytes
Neutrophils
Monocyte
TC
ID
Sex
Age, year
Hospitalization, days
within 72 hours of symptom onset
Diabetes
Atrial fibrillation
Hypertension
SAP
TG
HDL-C,mmol/l
LDL-C,mmol/l
WBC
Lymphocytes
Neutrophils
Monocyte
TC
ID
Sex
Age, year
Hospitalization, days
within 72 hours of symptom onset
Diabetes
Atrial fibrillation
Hypertension
SAP
TG
HDL-C,mmol/l
LDL-C,mmol/l
WBC
Lymphocytes
Neutrophils
Monocyte
TC
ID
Sex
Age, year
Hospitalization, days
within 72 hours of symptom onset
Diabetes
Atrial fibrillation
Hypertension
SAP
TG
HDL-C,mmol/l
LDL-C,mmol/l
WBC
Lymphocytes
Neutrophils
Monocyte
TC
ID
Sex
Age, year
Hospitalization, days
within 72 hours of symptom onset
Diabetes
Atrial fibrillation
Hypertension
SAP
TG
HDL-C,mmol/l
LDL-C,mmol/l
WBC
Lymphocytes
Neutrophils
Monocyte
TC
ID
Sex
Age, year
Hospitalization, days
within 72 hours of symptom onset
Diabetes
Atrial fibrillation
Hypertension
SAP
TG
HDL-C,mmol/l
LDL-C,mmol/l
WBC
Lymphocytes
Neutrophils
Monocyte
TC
ID
Sex
Age, year
Hospitalization, days
within 72 hours of symptom onset
Diabetes
Atrial fibrillation
Hypertension
SAP
TG
HDL-C,mmol/l
LDL-C,mmol/l
WBC
Lymphocytes
Neutrophils
Monocyte
TC
ID
Sex
Age, year
Hospitalization, days
within 72 hours of symptom onset
Diabetes
Atrial fibrillation
Hypertension
SAP
TG
HDL-C,mmol/l
LDL-C,mmol/l
WBC
Lymphocytes
Neutrophils
Monocyte
TC
ID
Sex
Age, year
Hospitalization, days
within 72 hours of symptom onset
Diabetes
Atrial fibrillation
Hypertension
SAP
TG
HDL-C,mmol/l
LDL-C,mmol/l
WBC
Lymphocytes
Neutrophils
Monocyte
TC
ID
Sex
Age, year
Hospitalization, days
within 72 hours of symptom onset
Diabetes
Atrial fibrillation
Hypertension
SAP
TG
HDL-C,mmol/l
LDL-C,mmol/l
WBC
Lymphocytes
Neutrophils
Monocyte
TC
ID
Sex
Age, year
Hospitalization, days
within 72 hours of symptom onset
Diabetes
Atrial fibrillation
Hypertension
SAP
TG
HDL-C,mmol/l
LDL-C,mmol/l
WBC
Lymphocytes
Neutrophils
Monocyte
TC
ID
Sex
Age, year
Hospitalization, days
within 72 hours of symptom onset
Diabetes
Atrial fibrillation
Hypertension
SAP
TG
HDL-C,mmol/l
LDL-C,mmol/l
WBC
Lymphocytes
Neutrophils
Monocyte
TC
ID
Sex
Age, year
Hospitalization, days
within 72 hours of symptom onset
Diabetes
Atrial fibrillation
Hypertension
SAP
TG
HDL-C,mmol/l
LDL-C,mmol/l
WBC
Lymphocytes
Neutrophils
Monocyte
TC
ID
Sex
Age, year
Hospitalization, days
within 72 hours of symptom onset
Diabetes
Atrial fibrillation
Hypertension
SAP
TG
HDL-C,mmol/l
LDL-C,mmol/l
WBC
Lymphocytes
Neutrophils
Monocyte
TC
ID
Sex
Age, year
Hospitalization, days
within 72 hours of symptom onset
Diabetes
Atrial fibrillation
Hypertension
SAP
TG
HDL-C,mmol/l
LDL-C,mmol/l
WBC
Lymphocytes
Neutrophils
Monocyte
TC
ID
Sex
Age, year
Hospitalization, days
within 72 hours of symptom onset
Diabetes
Atrial fibrillation
Hypertension
SAP
TG
HDL-C,mmol/l
LDL-C,mmol/l
WBC
Lymphocytes
Neutrophils
Monocyte
TC
ID
Sex
Age, year
Hospitalization, days
within 72 hours of symptom onset
Diabetes
Atrial fibrillation
Hypertension
SAP
TG
HDL-C,mmol/l
LDL-C,mmol/l
WBC
Lymphocytes
Neutrophils
Monocyte
TC
ID
Sex
Age, year
Hospitalization, days
within 72 hours of symptom onset
Diabetes
Atrial fibrillation
Hypertension
SAP
TG
HDL-C,mmol/l
LDL-C,mmol/l
WBC
Lymphocytes
Neutrophils
Monocyte
TC
ID
Sex
Age, year
Hospitalization, days
within 72 hours of symptom onset
Diabetes
Atrial fibrillation
Hypertension
SAP
TG
HDL-C,mmol/l
LDL-C,mmol/l
WBC
Lymphocytes
Neutrophils
Monocyte
TC
ID
Sex
Age, year
Hospitalization, days
within 72 hours of symptom onset
Diabetes
Atrial fibrillation
Hypertension
SAP
TG
HDL-C,mmol/l
LDL-C,mmol/l
WBC
Lymphocytes
Neutrophils
Monocyte
TC
ID
Sex
Age, year
Hospitalization, days
within 72 hours of symptom onset
Diabetes
Atrial fibrillation
Hypertension
SAP
TG
HDL-C,mmol/l
LDL-C,mmol/l
WBC
Lymphocytes
Neutrophils
Monocyte
TC
ID
Sex
Age, year
Hospitalization, days
within 72 hours of symptom onset
Diabetes
Atrial fibrillation
Hypertension
SAP
TG
HDL-C,mmol/l
LDL-C,mmol/l
WBC
Lymphocytes
Neutrophils
Monocyte
TC
ID
Sex
Age, year
Hospitalization, days
within 72 hours of symptom onset
Diabetes
Atrial fibrillation
Hypertension
SAP
TG
HDL-C,mmol/l
LDL-C,mmol/l
WBC
Lymphocytes
Neutrophils
Monocyte
TC
ID
Sex
Age, year
Hospitalization, days
within 72 hours of symptom onset
Diabetes
Atrial fibrillation
Hypertension
SAP
TG
HDL-C,mmol/l
LDL-C,mmol/l
WBC
Lymphocytes
Neutrophils
Monocyte
TC
